# Supplementary material for: Isolation of wheat bran-colonizing and metabolizing species from the human fecal microbiota
Source: PeerJ journal article supplement (doi:10.7717/peerj.6293), 2019-01-25
Supplement: DataS2.pdf [file DataS2.pdf]

## Supplementary Information:

### Isolation of wheat bran-colonizing and metabolizing species from the human fecal microbiota

De Paepe et al., Submission to PeerJ

2018

#### Availability of raw data

This Supplementary Data file contains the R code to reproduce all analyses and plots presented in the manuscript entitled “Isolation of wheat bran-colonizing and metabolizing species from the human fecal microbiota”. All the required datasets are uploaded as additional supplementary files (DataS3-S9).

The raw 16S rRNA next-generation amplicon sequencing data is, moreover, deposited in the NCBI sequence read archive (SRA) under the accession number SRP091975 <https://trace.ncbi.nlm.nih.gov/Traces/study/?acc=SRP091975&go=go>. Raw 16S rRNA gene Sanger sequences of the isolates are supplied as a compressed folder (Sanger\_isolates.zip). This folder and the raw Data files should be present in the same working directory containing this .Rmd script.

#### Load the packages and datasets

The following packages are required to run the script:

```
# Formatting data
library(reshape2)
library(plyr)
library(dplyr)
library(tidyr)
library(stringi)
library(stringr)
library(splitstackshape)
library(tibble)
library(gtools)

# Plotting data
library(ggplot2)
library(gridExtra)
```

```

library(cowplot)
require(scales)
library(gplots)

# User defined functions (make sure that the R scripts below are present in the
# same working directory as this Rmarkdown script)
source('DataS11.R') # formatting of ggplot graphs
source('DataS12.R') # formatting mothur taxonomy file

# Processing of 16S rRNA gene Sanger sequencing data
library("ape")
library("phangorn", lib.loc="/usr/local/lib/R/site-library")
source("https://bioconductor.org/biocLite.R")
biocLite("DECIPHER")
biocLite("Biostrings")
biocLite("sangerseqR")
library(devtools)
install_github("Liliad/sangeranalyseR")
library(sangeranalyseR)

# Processing of next-generation 16S rRNA gene amplicon sequencing data
biocLite("phyloseq")
library("phyloseq")
library(vegan)

# Rmarkdown knitr
library(knitr)

```

Load the functional data (short chain fatty acid production in the enrichment series):

```
enrichment_SCFA <- read.csv("DataS3.csv")
```

Load the 16S rRNA gene amplicon sequencing data (read count table and taxonomy):

```

# READ COUNT DATA
shared3 <- read.csv("DataS4.csv", header=TRUE)
rownames(shared3) <- shared3[,1]
shared3 <- shared3[, -1]

# Transpose
shared3 <- as.data.frame(t(shared3))

# Apply filtering cut-offs from the waste not want not paper by McMurdie and
# Holmes (2014)
shared3mingsingleton <- shared3[rowSums(shared3) != 0, ]
shared3mingsingleton <- shared3mingsingleton[rowSums(shared3mingsingleton) != 1, ]
minobs=1
prevalence <- apply(as.matrix(shared3mingsingleton), 1, function(x, minobs){sum(x
>=minobs)}, minobs)/ncol(shared3mingsingleton)
prevalencefilter <- prevalence > 0.05

```

```

shared3mingsingletonwnwn <- shared3mingsingleton[prevalencefilter,]
shared3mingsingletonwnwn <- shared3mingsingletonwnwn[ rowSums(shared3mingsingletonwnwn)>0.5*ncol(shared3mingsingletonwnwn),]

# Transform to proportions
shared3mingsingletonwnwnprop = sweep(shared3mingsingletonwnwn,2,colSums(shared3mingsingletonwnwn),'/')

#TAXONOMY
RDPTax <- read.csv("DataS6.csv")
RDPTax <- splittax(RDPTax,"otu")
rownames(RDPTax) <- RDPTax$id
RDPTax <- RDPTax[,-1]
RDPTax_noprob <- dplyr::select(RDPTax,-contains("prob"))

# Formatting
RDPTax_noprob$Genus <- mapvalues(RDPTax_noprob$Genus,from=c("Enterobacteriaceae_unclassified","Erysipelotrichaceae_unclassified","Lachnospiraceae_unclassified","Lactobacillales_unclassified","Actinobacteria_unclassified","Burkholderiales_unclassified","Clostridiales_unclassified","Ruminococcaceae_unclassified","Coriobacteriaceae_unclassified"),to=c("Enterobacteriaceae","Erysipelotrichaceae","Lachnospiraceae","Lactobacillales","Actinobacteria","Burkholderiales","Clostridiales","Ruminococcaceae","Coriobacteriaceae"))

#COMBINE IN OTU TABLE
otutab3 <- dplyr::select(RDPTax_noprob,-Species)
otutab3 <- cbind(otutab3[rownames(shared3mingsingletonwnwnprop),],shared3mingsingletonwnwnprop)

# Constructing Genus Level otutable with RDP taxonomy
genusotutab3 <- aggregate(. ~ Genus, data=otutab3[,-c(1:5)], FUN=sum)
rownames(genusotutab3) <- genusotutab3[,1]
genusotutab3 <- genusotutab3[,-1]

# Constructing Family Level otutable with with RDP taxonomy
familyotutab3 <- aggregate(. ~ Family, data=otutab3[,-c(1:4,6)], FUN=sum)
rownames(familyotutab3) <- familyotutab3[,1]
familyotutab3 <- familyotutab3[,-1]

# Constructing Order Level otutable with with RDP taxonomy
orderotutab3 <- aggregate(. ~ Order, data=otutab3[,-c(1:3,5,6)], FUN=sum)
rownames(orderotutab3) <- orderotutab3[,1]
orderotutab3 <- orderotutab3[,-1]

# Constructing Class Level otutable with with RDP taxonomy
classotutab3 <- aggregate(. ~ Class, data=otutab3[,-c(1:2,4:6)], FUN=sum)
rownames(classotutab3) <- classotutab3[,1]
classotutab3 <- classotutab3[,-1]

```

```

# Constructing Phylum Level otutable with with RDP taxonomy
phylumotutab3 <- aggregate(. ~ Phylum, data=otutab3[, -c(1,3:6)], FUN=sum)
rownames(phylumotutab3) <- phylumotutab3[,1]
phylumotutab3 <- phylumotutab3[, -1]

# ABUNDANCE DATA
shared4 <- read.csv("DataS5.csv", header=TRUE)
rownames(shared4) <- shared4[,1]
shared4 <- shared4[, -1]

# Transpose
shared4 <- as.data.frame(t(shared4))

# Apply filtering cut-offs from the waste not want not paper by McMurdie and
Holmes (2014)
shared4mingsingleton <- shared4[rowSums(shared4) != 0,]
shared4mingsingleton <- shared4mingsingleton[rowSums(shared4mingsingleton) != 1,]
minobs=1
prevalence <- apply(as.matrix(shared4mingsingleton), 1, function(x, minobs){sum(x
>=minobs)}, minobs)/ncol(shared4mingsingleton)
prevalencefilter <- prevalence > 0.05
shared4mingsingletonnwnwn <- shared4mingsingleton[prevalencefilter,]
shared4mingsingletonnwnwn <- shared4mingsingletonnwnwn[rowSums(shared4mingsingleto
nwnwn) > 0.5 * ncol(shared4mingsingletonnwnwn),]

# Transform to proportions
shared4mingsingletonnwnwnprop = sweep(shared4mingsingletonnwnwn, 2, colSums(shared4
mingsingletonnwnwn), '/')

# TAXONOMY DATA
RDPTax4 <- read.csv("DataS7.csv")
RDPTax4 <- splittax(RDPTax4, "otu")
rownames(RDPTax4) <- RDPTax4$id
RDPTax4 <- RDPTax4[, -1]
RDPTax4_noprob <- dplyr::select(RDPTax4, -contains("prob"))

RDPTax4_noprob$Genus <- mapvalues(RDPTax4_noprob$Genus, from=c("Enterobacteria
ceae_unclassified", "Erysipelotrichaceae_unclassified", "Lachnospiraceae_unclas
sified", "Lactobacillales_unclassified", "Actinobacteria_unclassified", "Burkhol
deriales_unclassified", "Clostridiales_unclassified", "Ruminococcaceae_unclassi
fied", "Coriobacteriaceae_unclassified", "Lactobacillaceae_unclassified", "Micro
bacteriaceae_unclassified"), to=c("Enterobacteriaceae", "Erysipelotrichaceae", "
Lachnospiraceae", "Lactobacillales", "Actinobacteria", "Burkholderiales", "Clostr
idiales", "Ruminococcaceae", "Coriobacteriaceae", "Lactobacillaceae", "Microbacte
riaceae"))

# COMBINE IN OTU TABLE
otutab4 <- dplyr::select(RDPTax4_noprob, -Species)
otutab4 <- cbind(otutab4[rownames(shared4mingsingletonnwnwnprop),], shared4minsi
ngletonnwnwnprop)

```

```

# Constructing Genus Level otutable with RDP taxonomy
genusotutab4 <- aggregate(. ~ Genus, data=otutab4[,-c(1:5)], FUN=sum)
rownames(genusotutab4) <- genusotutab4[,1]
genusotutab4 <- genusotutab4[,-1]

# Constructing Family Level otutable with with RDP taxonomy
familyotutab4 <- aggregate(. ~ Family, data=otutab4[,-c(1:4,6)], FUN=sum)
rownames(familyotutab4) <- familyotutab4[,1]
familyotutab4 <- familyotutab4[,-1]

# Constructing Order Level otutable with with RDP taxonomy
orderotutab4 <- aggregate(. ~ Order, data=otutab4[,-c(1:3,5,6)], FUN=sum)
rownames(orderotutab4) <- orderotutab4[,1]
orderotutab4 <- orderotutab4[,-1]

# Constructing Class Level otutable with with RDP taxonomy
classotutab4 <- aggregate(. ~ Class, data=otutab4[,-c(1:2,4:6)], FUN=sum)
rownames(classotutab4) <- classotutab4[,1]
classotutab4 <- classotutab4[,-1]

# Constructing Phylum Level otutable with with RDP taxonomy
phylumotutab4 <- aggregate(. ~ Phylum, data=otutab4[,-c(1,3:6)], FUN=sum)
rownames(phylumotutab4) <- phylumotutab4[,1]
phylumotutab4 <- phylumotutab4[,-1]

```

Load the metadata:

```

sampleinfo3 <- read.csv('DataS8.csv',header=TRUE)
sampleinfo3$Lumen_bran <- factor(sampleinfo3$Lumen_bran,levels=c("FS","Lumen",
" Bran"))
sampleinfo3$pH <-factor(sampleinfo3$pH,levels=c("5.8","6.8"))

sampleinfo4 <- read.csv('DataS9.csv',header=TRUE)
sampleinfo4$Lumen_bran <- factor(sampleinfo4$Lumen_bran,levels=c("FS","Lumen",
" Bran"))
sampleinfo4$pH <-factor(sampleinfo4$pH,levels=c("5.8","6.8"))

```

Specify color vectors:

```

# Colors
fourcolors <- c("#DC143C", "#8B5F65", "#00008B", "#EE9A00")
eightcolors=c("#7B4B71", "#C5CD42", "#C44F44", "#91B7C0", "#484934", "#BA9C5F", "#B
167C8", "#69C467")

elevencolors = c("#000000", "#CD6600", "#36648B", "#008B00", "#7A378B", "#838B83",
"#8B0000", "#323C4D", "#A03D44", "#98B736", "#C8ADA4")
fifteencolors <- c("#000000", "#CD6600", "#36648B", "#008B00", "#7A378B", "#838B83
", "#8B0000", "#323C4D", "#A03D44", "#98B736", "#C8ADA4", "#BB5236", "#7FCD50", "#AB5
CC7", "#C9A325")

```

```
thirtycolors=c("#323F24", "#CB51D7", "#72E245", "#DE4F2D", "#81DDC7", "#6584C6", "#CFAE3C", "#914261", "#BFDC86", "#CDC6BE", "#D3469A", "#3C315A", "#607B30", "#DD4469", "#5B9072", "#CA9FC7", "#7F592D", "#5A656D", "#D1867F", "#4C2426", "#79B6CE", "#6E67D1", "#CBDC3F", "#63D98B", "#97362B", "#CBB37D", "#7E3F85", "#CF8338", "#5DA73A", "#CB80D0")
```

```
# Resolution of figures
```

```
dpi <- 300
```

Sanger sequences of the isolates are supplied as a compressed folder (Sanger\_isolates.zip).

## SCFA production during consecutive enrichment steps

The fecal sample (enrichment step 0) and the liquid broth in the enrichment Hungate tubes after each transfer (enrichment steps 1 to 4) were sampled for SCFA analysis.

```
SCFA <- melt(enrichment_SCFA, id.vars=c("Donor", "pHstart", "Enrichment", "pHend"))
SCFA1 <- subset(SCFA, Donor=="1")
SCFA2 <- subset(SCFA, Donor=="2")
SCFA3 <- subset(SCFA, Donor=="3")
SCFA4 <- subset(SCFA, Donor=="4")
```

```
p <- ggplot(data=SCFA1, aes(x=Enrichment, y=as.numeric(as.character(value))))
p <- p + geom_bar(stat="identity", aes(fill=variable))
p <- papertheme(p) + facet_grid(pHstart~., drop=TRUE, scale="free_x", space="free_x") + scale_fill_manual(values=eightcolors, name=NULL)
p <- p + ylab("Donor 1 SCFA (mM)") + xlab("Enrichment step") + theme(strip.text.y = element_text(angle=0), legend.justification="center") + guides(fill=guide_legend(nrow=2))
p <- p + geom_text(data=SCFA1, aes(x=Enrichment, y=100, label=pHend), size=6)
mylegendSCFA <- get_legend(p)
SCFAAd1 <- p + theme(legend.position = "none", axis.title.x = element_text(color="white"))
```

```
p <- ggplot(data=SCFA1, aes(x=Enrichment, y=as.numeric(as.character(value))))
p <- p + geom_bar(stat="identity", aes(fill=variable))
p <- papertheme(p) + facet_grid(pHstart~., drop=TRUE, scale="free_x", space="free_x") + scale_fill_manual(values=eightcolors, name=NULL)
p <- p + ylab("Donor 1 SCFA (mM)") + xlab("Enrichment step") + theme(strip.text.y = element_text(angle=0), legend.justification="center") + guides(fill=guide_legend(nrow=2))
p <- p + geom_text(data=SCFA1, aes(x=Enrichment, y=100, label=pHend), size=6)
mylegendSCFA <- get_legend(p)
SCFAAd1 <- p + theme(legend.position = "none", axis.title.x = element_text(color="white"))
```

```
p <- ggplot(data=SCFA2, aes(x=Enrichment, y=as.numeric(as.character(value))))
p <- p + geom_bar(stat="identity", aes(fill=variable))
```

```

p <- papertheme(p) +facet_grid(pHstart~.,drop=TRUE,scale="free_x",space="free_x") + scale_fill_manual(values=eightcolors)
p <- p+ ylab("Donor 2 SCFA (mM)") + xlab("Enrichment step") + theme(legend.text=element_text(face='italic'),strip.text.y = element_text(angle=0)) +guides(fill=guide_legend(nrow=4))
p <- p + geom_text(data=SCFA2,aes(x=Enrichment,y=85,label=pHend),size=6)
SCFAd2 <- p + theme(legend.position = "none",axis.title.x = element_text(color="white"))

p <- ggplot(data=SCFA3,aes(x=Enrichment,y=as.numeric(as.character(value))))
p <- p +geom_bar(stat="identity",aes(fill=variable))
p <- papertheme(p) +facet_grid(pHstart~.,drop=TRUE,scale="free_x",space="free_x") + scale_fill_manual(values=eightcolors)
p <- p+ ylab("Donor 3 SCFA (mM)") + xlab("Enrichment step") + theme(legend.text=element_text(face='italic'),strip.text.y = element_text(angle=0)) +guides(fill=guide_legend(nrow=4))
p <- p + geom_text(data=SCFA3,aes(x=Enrichment,y=100,label=pHend),size=6)
SCFAd3 <- p + theme(legend.position = "none")

p <- ggplot(data=SCFA4,aes(x=Enrichment,y=as.numeric(as.character(value))))
p <- p +geom_bar(stat="identity",aes(fill=variable))
p <- papertheme(p) +facet_grid(pHstart~.,drop=TRUE,scale="free_x",space="free_x") + scale_fill_manual(values=eightcolors)
p <- p+ ylab("Donor 4 SCFA (mM)") + xlab("Enrichment step") + theme(legend.text=element_text(face='italic'),strip.text.y = element_text(angle=0)) +guides(fill=guide_legend(nrow=4))
p <- p + geom_text(data=SCFA4,aes(x=Enrichment,y=100,label=pHend),size=6)
SCFAd4 <- p + theme(legend.position = "none")

tiff("Figure2.tiff",width=10*dpi,height=16*dpi,res=dpi,compression="lzw")
cowplot::plot_grid(plot_grid(SCFAd1,SCFAd2,SCFAd3,SCFAd4,nrow=2,ncol=2,rel_heights =c(0.5,0.5,0.5,0.5),rel_widths=c(0.5,0.5,0.5,0.5),labels='AUTO',label_size=20,label_fontfamily='sans'),mylegendSCFA,nrow=2,rel_heights=c(0.95,0.05))
dev.off()

## png
## 2

knitr::include_graphics("Figure2.tiff")

```

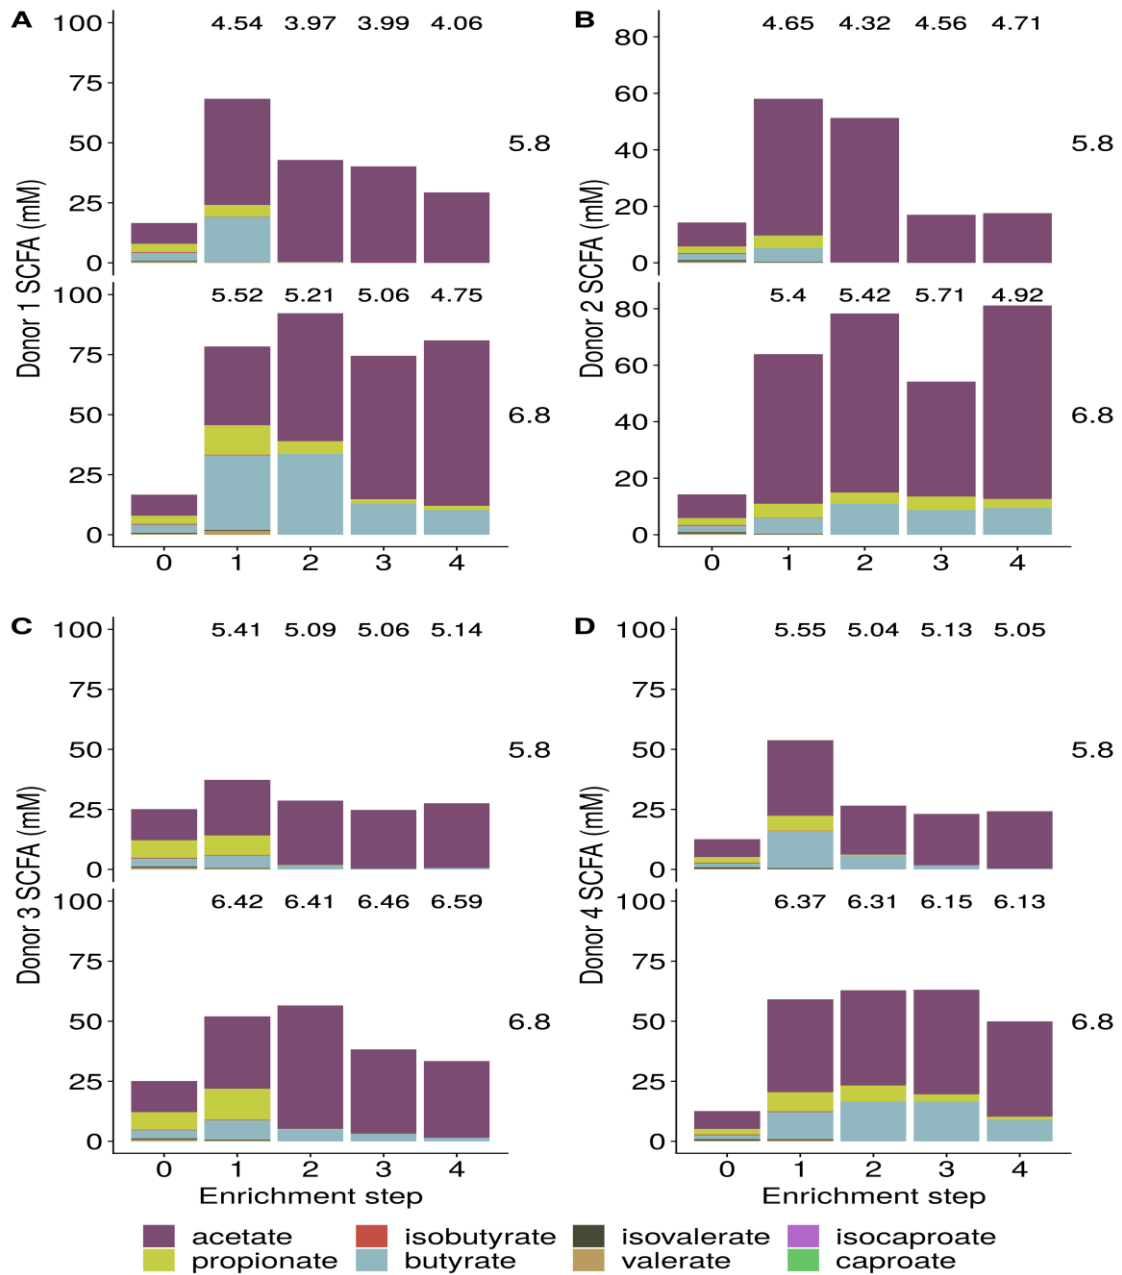

**Figure 2: Short Chain Fatty Acid( (SCFA) production by the fecal microbiota derived from four different donors during enrichment with wheat bran as the sole nutrient source. The fecal sample (enrichment step 0) was incubated with wheat bran for 24 h (enrichment step 1), after which the wheat bran residue was washed to remove loosely attached bacteria and used to seed a new incubation (enrichment step 2). This procedure was repeated two more times (enrichment step 3 and 4). The pH is indicated on top of the stacked bars and decreased considerably comparing to the starting pH (5.8 and 6.8).**



## Richness and Diversity indices calculated on the next-generation 16S rRNA gene amplicon sequencing confirm the 'enrichment'

The outcome of the enrichment procedure was assessed by computing richness (Chao1 Richness estimator) and diversity (Shannon, Simpson, inverse Simpson and Fisher alpha) estimators using `vegan_2.4-4` (Oksanen et al. 2016).

```
dataunnormalised <- as.data.frame(t(shared3))
# Calculate the chao index
chaoest=apply(dataunnormalised,1,function(x) estimateR(x))[2,]
# Annotate the dataframe
richnessdf <- cbind(chaoest,sampleinfo3)
richnessdf$Enrichment <-as.numeric(as.character(richnessdf$Enrichment))
richness1 <- subset(richnessdf,Donor=="1"&Nameshared!="Donor2_low4_Brep.V4")
richness2 <- subset(richnessdf,Donor=="2")
richness3<- subset(richnessdf,Donor=="3")
# Repeat for donor 4
dataunnormalised <- as.data.frame(t(shared4))
chaoest=apply(dataunnormalised,1,function(x) estimateR(x))[2,]
richnessdf4 <- cbind(chaoest,sampleinfo4)
richnessdf4$Enrichment <- as.numeric(as.character(richnessdf4$Enrichment))
richness4 <- subset(richnessdf4,Donor=="4")

# Evolution of the chao richness during consecutive enrichment steps in donor
1 (Figure 3A in the manuscript)
p <- ggplot(data=richness1,aes(x=Enrichment,y=as.numeric(as.character(chaoest
))))
p <- p +geom_line(aes(group=Lumen_bran,linetype=Lumen_bran))+geom_point(aes(s
hape=Lumen_bran),size=5)
p <- papertheme(p) +facet_grid(pH~.,drop=TRUE,scale="free_x",space="free_x")
+ scale_fill_manual(values=eightcolors,name=NULL) + scale_shape_manual(name=N
ULL,values=c(15,16,17))+ scale_linetype_manual(name=NULL,values=c(0,1,2))
p <- p+ ylab("Chao1 richness estimator \n Donor1") + xlab("Enrichment step")
+ theme(strip.text.y = element_text(angle=0)) +guides(fill=guide_legend(nrow=
2))+ theme(legend.key.width = unit(2,"cm"))
richplot1 <- p + theme(legend.position = "none",axis.title.x = element_text(c
olor="white"))

# Evolution of the chao richness during consecutive enrichment steps in three
donors
richness <- rbind(richness1,richness2,richness3)
richness$Donor <- as.factor(richness$Donor)

p <- ggplot(data=richness,aes(x=Enrichment,y=as.numeric(as.character(chaoest
))))
p <- p +geom_line(aes(group=interaction(Lumen_bran,Donor),color=Donor))+geom_
point(aes(shape=Lumen_bran,color=Donor),size=5)
p <- papertheme(p) +facet_grid(pH~.,drop=TRUE,scale="free_x",space="free_x")
+ scale_color_manual(values=fourcolors,name=NULL)
```

```

p <- p + ylab("Chao richness estimator") + xlab("Enrichment step") + theme(leg
end.text=element_text(face='italic'),strip.text.y = element_text(angle=0)) +g
uides(fill=guide_legend(nrow=2))
richplot <- p + theme(legend.position = "none",axis.title.x = element_text(co
lor="white"))

dataunnormalised <- as.data.frame(t(shared3))
# Calculate different diversity indices
divdf <- data.frame(shannon=apply(dataunnormalised,1,function(x) vegan::diver
sity(x)),simpson=apply(dataunnormalised,1,function(x) vegan::diversity(x,"sim
p")),invsimpson=apply(dataunnormalised,1,function(x) vegan::diversity(x,"inv"
)),fisher=apply(dataunnormalised,1,function(x) vegan::fisher.alpha(x)))
# Annotate the dataframe
divdf <- cbind(divdf,sampleinfo3)
divdf$Enrichment <- as.numeric(as.character(divdf$Enrichment))
divdf1 <- subset(divdf,Donor=="1"&Nameshared!="Donor2_low4_Brep.V4")
divdf1$Lumen_bran <- mapvalues(divdf1$Lumen_bran,from="FS",to="Fecal sample")

divdf2 <- subset(divdf,Donor=="2")
divdf3<- subset(divdf,Donor=="3")
# Repeat for donor 4
dataunnormalised <- as.data.frame(t(shared4))
divdf4 <- data.frame(shannon=apply(dataunnormalised,1,function(x) vegan::dive
rsity(x)),simpson=apply(dataunnormalised,1,function(x) vegan::diversity(x,"si
mp")),invsimpson=apply(dataunnormalised,1,function(x) vegan::diversity(x,"inv
")),fisher=apply(dataunnormalised,1,function(x) vegan::fisher.alpha(x)))
divdf4 <- cbind(divdf4,sampleinfo4)

# Evolution of the diversity indices during consecutive enrichment steps in d
onor 1 (Figure 3B in the manuscript)
p <- ggplot(data=divdf1,aes(x=Enrichment,y=as.numeric(as.character(shannon)))
)
p <- p +geom_line(aes(group=Lumen_bran,linetype=Lumen_bran))+geom_point(aes(s
hape=Lumen_bran),size=5)
p <- papertHEME(p) +facet_grid(pH~.,drop=TRUE,scale="free_x",space="free_x")
+ scale_fill_manual(values=eightcolors,name=NULL) + scale_shape_manual(name=N
ULL,values=c(15,16,17)) + scale_linetype_manual(name=NULL,values=c(0,1,2))
p <- p+ ylab("Shannon diversity index \n Donor 1") + xlab("Enrichment step")
+ theme(strip.text.y = element_text(angle=0)) +guides(fill=guide_legend(nrow=
2)) + theme(legend.justification="center") + theme(legend.key.width = unit(2,
"cm"))
mylegendrichndiv <- get_legend(p)
divplot1 <- p + theme(legend.position = "none")
# Evolution of the diversity indices during consecutive enrichment steps thre
e donors
divdf <- rbind(divdf1,divdf2,divdf3)
divdf$Donor <- as.factor(divdf$Donor)

p <- ggplot(data=divdf,aes(x=Enrichment,y=as.numeric(as.character(shannon))))
p <- p +geom_line(aes(group=interaction(Lumen_bran,Donor),color=Donor))+geom_

```

```

point(aes(shape=Lumen_bran,color=Donor),size=5)
p <- papertheme(p) +facet_grid(pH~.,drop=TRUE,scale="free_x",space="free_x")
+ scale_color_manual(values=fourcolors,name=NULL)
p <- p+ ylab("Chao richness estimator") + xlab("Enrichment step") + theme(leg
end.text=element_text(face='italic'),strip.text.y = element_text(angle=0)) +g
uides(fill=guide_legend(nrow=2))
p <- p + theme(legend.position = "none",axis.title.x = element_text(color="wh
ite"))

tiff("Figure3.tiff",width=6*dpi,height=14*dpi,res=dpi,compression="lzw")
cowplot::plot_grid(plot_grid(richplot1,divplot1,ncol=1,rel_heights = c(0.5,0.
5),labels='AUTO',label_size=20,label_fontfamily='sans'),mylegendrichndiv,nrow
=2,rel_heights=c(0.95,0.05))
dev.off()

## png
## 2

include_graphics("Figure3.tiff")

```

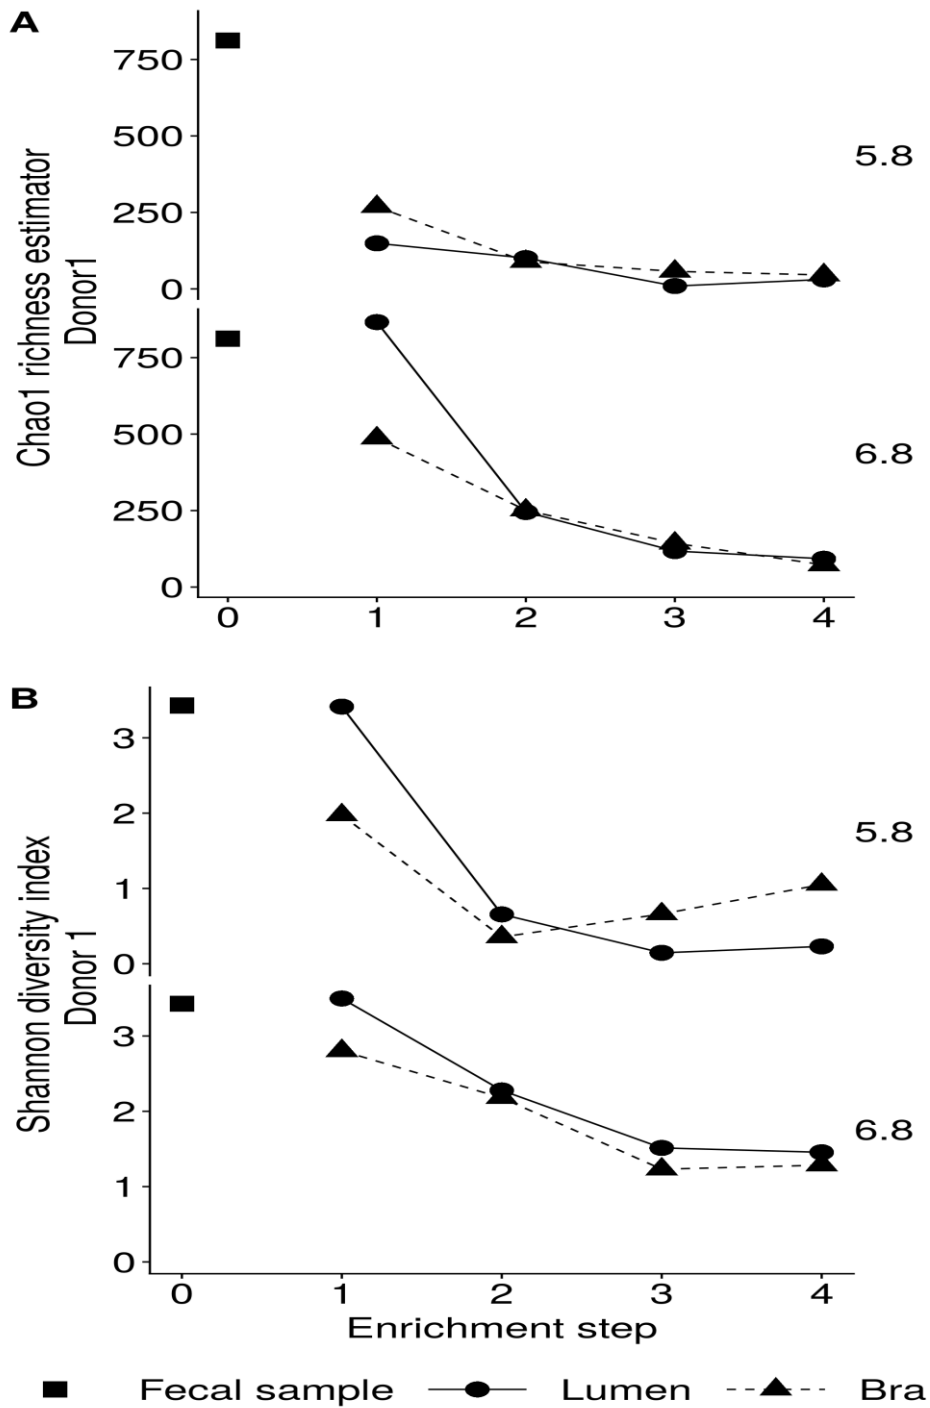

**Figure 3: Reduction in the microbial community richness (Chao 1 richness estimator) and diversity (Shannon diversity index) during consecutive enrichment steps with wheat bran as the sole nutrient source, as shown for donor 1. The fecal sample (enrichment step 0) was incubated with wheat bran for 24 h (enrichment step 1), after which the wheat bran residue was washed to remove loosely attached bacteria and used to seed a new incubation (enrichment step 2). This procedure was repeated two more times (enrichment step 3 and 4).**

## Identification of the enriched species by next-generation 16S rRNA gene amplicon sequencing

Bar graphs of the proportional microbial community composition at phylum, genus, and species level were created to demonstrate community shifts during consecutive enrichment steps with wheat bran as the sole nutrient source.

```
otuspec <- phylumotutab3
otuspec <- 100*otuspec
otuspec <- rbind(names=colnames(otuspec),otuspec)
otuspec <- mutate(as.data.frame(t(otuspec)),donor=sampleinfo3$Donor,LBM=sampleinfo3$Lumen_bran,enrichment=sampleinfo3$Enrichment,pH=sampleinfo3$pH)
otuspec <- melt(otuspec,id.vars=c('donor','LBM','enrichment','pH','names'))
otuspec1 <- subset(otuspec,donor=="1"&enrichment!="c"&names!="Donor2_low4_Brep.V4")
otuspec2 <- subset(otuspec,donor=="2"&enrichment!="c"&names!="Donor2_low4_Brep.V4")
otuspec3<- subset(otuspec,donor=="3"&enrichment!="c"&names!="Donor2_low4_Brep.V4")

# Donor1
p <- ggplot(data=otuspec1,aes(x=LBM,y=as.numeric(as.character(value))))
p <- p +geom_bar(stat="identity",aes(fill=variable))
p <- papertheme(p) +facet_grid(pH~enrichment,drop=TRUE,scale="free_x",space="free_x") + scale_fill_manual(values=elevencolors)
p <- p+ ylab("Relative abundance (%)") + xlab(NULL) + theme(legend.text=element_text(face='italic'),strip.text.y = element_text(angle=0)) +guides(fill=guide_legend(nrow=4))

# Donor2
p <- ggplot(data=otuspec2,aes(x=LBM,y=as.numeric(as.character(value))))
p <- p +geom_bar(stat="identity",aes(fill=variable))
p <- papertheme(p) +facet_grid(pH~enrichment,drop=TRUE,scale="free_x",space="free_x") + scale_fill_manual(values=elevencolors)
p <- p+ ylab("Relative abundance (%)") + xlab(NULL) + theme(legend.text=element_text(face='italic'),strip.text.y = element_text(angle=0)) +guides(fill=guide_legend(nrow=4))

#Donor3
p <- ggplot(data=otuspec3,aes(x=LBM,y=as.numeric(as.character(value))))
p <- p +geom_bar(stat="identity",aes(fill=variable))
p <- papertheme(p) +facet_grid(pH~enrichment,drop=TRUE,scale="free_x",space="free_x") + scale_fill_manual(values=elevencolors)
p <- p+ ylab("Relative abundance (%)") + xlab(NULL) + theme(legend.text=element_text(face='italic'),strip.text.y = element_text(angle=0)) +guides(fill=guide_legend(nrow=4))

otuspec<- genusotutab3
otuspec <- cbind(sampleinfo3,t(otuspec))
```

```

otuspec <- subset(otuspec, Enrichment!="c")
otuspec <- otuspec[, -c(1:length(colnames(sampleinfo3)))]
otuspec <- data.frame(t(otuspec))
selecttop20par <- rowSums(otuspec)
otuspec <- tibble::rownames_to_column(otuspec)
otuspec <- as.data.frame(otuspec %>% top_n(13, selecttop20par))
other <- 1-colSums(otuspec[, -1])
rownames(otuspec) <- otuspec$rowname
otuspec <- otuspec[, -1]
otuspec <- rbind(otuspec, other)
rownames(otuspec)[nrow(otuspec)] <- "Other"
otuspec <- 100*otuspec

sampleinfosub3 <- subset(sampleinfo3, Enrichment!="c")
otuspec <- mutate(as.data.frame(t(otuspec)), donor=sampleinfosub3$Donor, LBM=sampleinfosub3$Lumen_bran, enrichment=sampleinfosub3$Enrichment, pH=sampleinfosub3$pH, names=colnames(otuspec))
otuspec <- melt(otuspec, id.vars=c('donor', 'LBM', 'enrichment', 'pH', 'names'))
otuspec1 <- subset(otuspec, donor=="1"&names!="Donor2_low4_Brep.V4")
otuspec2 <- subset(otuspec, donor=="2"&names!="Donor2_low4_Brep.V4")
otuspec3 <- subset(otuspec, donor=="3"&names!="Donor2_low4_Brep.V4")

# Donor1
p <- ggplot(data=otuspec1, aes(x=LBM, y=as.numeric(as.character(value))))
p <- p +geom_bar(stat="identity", aes(fill=variable))
p <- papertheme(p) +facet_grid(pH~enrichment, drop=TRUE, scale="free_x", space="free_x") + scale_fill_manual(values=fifteencolors, name="Genus")
p <- p+ ylab("Relative abundance (%)") + xlab(NULL) + theme(legend.text=element_text(face='italic'), strip.text.y = element_text(angle=0), legend.position="right") +guides(fill=guide_legend(ncol=1))
bargraph1genus <- p

# Donor2
p <- ggplot(data=otuspec2, aes(x=LBM, y=as.numeric(as.character(value))))
p <- p +geom_bar(stat="identity", aes(fill=variable))
p <- papertheme(p) +facet_grid(pH~enrichment, drop=TRUE, scale="free_x", space="free_x") + scale_fill_manual(values=fifteencolors, name="Genus")
p <- p+ ylab("Relative abundance (%)") + xlab(NULL) + theme(legend.text=element_text(face='italic'), strip.text.y = element_text(angle=0), legend.position="right") +guides(fill=guide_legend(ncol=1))

# Donor3
p <- ggplot(data=otuspec3, aes(x=LBM, y=as.numeric(as.character(value))))
p <- p +geom_bar(stat="identity", aes(fill=variable))
p <- papertheme(p) +facet_grid(pH~enrichment, drop=TRUE, scale="free_x", space="free_x") + scale_fill_manual(values=fifteencolors, name="Genus")
p <- p+ ylab("Relative abundance (%)") + xlab(NULL) + theme(legend.text=element_text(face='italic'), strip.text.y = element_text(angle=0), legend.position="right") +guides(fill=guide_legend(ncol=1))

```

```

# Donor4
otuspec<- genusotutab4
selecttop20par <- rowSums(otuspec)
otuspec <- tibble::rownames_to_column(otuspec)
otuspec <- as.data.frame(otuspec %>% top_n(13,selecttop20par))
other <- 1-colSums(otuspec[,-1])
rownames(otuspec) <- otuspec$rowname
otuspec <- otuspec[,-1]
otuspec <- rbind(otuspec,other)
rownames(otuspec)[nrow(otuspec)] <- "Other"
otuspec <- otuspec*100

otuspec <- mutate(as.data.frame(t(otuspec)),donor=sampleinfo4$Donor,LBM=sampleinfo4$Lumen_bran,enrichment=sampleinfo4$Enrichment,pH=sampleinfo4$pH, names=colnames(otuspec))
otuspec4 <- melt(otuspec,id.vars=c('donor','LBM','enrichment','pH','names'))

p <- ggplot(data=otuspec4,aes(x=LBM,y=as.numeric(as.character(value))))
p <- p +geom_bar(stat="identity",aes(fill=variable))
p <- papertheme(p) +facet_grid(pH~enrichment,drop=TRUE,scale="free_x",space="free_x") + scale_fill_manual(values=fifteencolors,name="Genus")
p <- p+ ylab("Relative abundance (%)") + xlab(NULL) + theme(legend.text=element_text(face='italic'),strip.text.y = element_text(angle=0),legend.position="right") +guides(fill=guide_legend(ncol=1))

# Species level annotation of OTUs (verified by BLAST and RDP)
label3donorsillu <- c("OTU1 Bifidobacterium sp.,"OTU2 Enterobacteriaceae sp.",
,"OTU3 Escherichia/Shigella sp.,"OTU4 Lactobacillus sp.,"OTU5 Faecalibacterium prausnitzii",
"OTU6 Prevotella copri","OTU7 Faecalibacterium prausnitzii",
"OTU8 Pediococcus sp.,"OTU9 E. rectale/R. faecis","OTU10 Fusobacterium mortiferum",
"OTU11 Bacteroides dorei","OTU12 Dialister sp.,"OTU13 Sutterella wadsworthensis",
"OTU14 Lactobacillus sp.,"OTU15","OTU16 Bacteroides eggerthii",
"OTU17 Blautia wexlerae","OTU18 Lactobacillus fermentus","OTU19 Fusicatenibacter saccharivorans",
"OTU20 Roseburia faecis","Other")
otuspec<-otutab3[,-c(1:6)]
otuspec <- cbind(sampleinfo3,t(otuspec))
otuspec <- subset(otuspec,Enrichment!="c")
otuspec <- otuspec[,-c(1:length(colnames(sampleinfo3)))]
otuspec <- data.frame(t(otuspec))
selecttop20par <- rowSums(otuspec)
otuspec <- tibble::rownames_to_column(otuspec)
otuspec <- as.data.frame(otuspec %>% top_n(20,selecttop20par))
other <- 1-colSums(otuspec[,-1])
rownames(otuspec) <- otuspec$rowname
otuspec <- otuspec[,-1]
otuspec <- rbind(otuspec,other)
rownames(otuspec)[nrow(otuspec)] <- "Other"
otuspec <- 100*otuspec

sampleinfosub3 <- subset(sampleinfo3,Enrichment!="c")

```



```

otuspec <- mutate(as.data.frame(t(otuspec)),donor=sampleinfosub3$Donor,LBM=sa
mpleinfosub3$Lumen_bran,enrichment=sampleinfosub3$Enrichment,pH=sampleinfosub
3$pH,names=colnames(otuspec))
otuspec <- melt(otuspec,id.vars=c('donor','LBM','enrichment','pH','names'))
otuspec1 <- subset(otuspec,donor=="1"&names!="Donor2_low4_Brep.V4")
otuspec2 <- subset(otuspec,donor=="2"&names!="Donor2_low4_Brep.V4")
otuspec3<- subset(otuspec,donor=="3"&names!="Donor2_low4_Brep.V4")

# Donor1
p <- ggplot(data=otuspec1,aes(x=LBM,y=as.numeric(as.character(value))))
p <- p +geom_bar(stat="identity",aes(fill=variable))
p <- papertheme(p) +facet_grid(pH~enrichment,drop=TRUE,scale="free_x",space="
free_x") + scale_fill_manual(values=thirtycolors,name="Species",labels=label3
donorsillu)
p <- p+ ylab("Relative abundance (%)") + xlab(NULL) + theme(legend.text=elemen
t_text(face='italic'),strip.text.y = element_text(angle=0),legend.position="
right") +guides(fill=guide_legend(ncol=1))
bargraph1species <- p

#Donor2
p <- ggplot(data=otuspec2,aes(x=LBM,y=as.numeric(as.character(value))))
p <- p +geom_bar(stat="identity",aes(fill=variable))
p <- papertheme(p) +facet_grid(pH~enrichment,drop=TRUE,scale="free_x",space="
free_x") + scale_fill_manual(values=thirtycolors,name="Species")
p <- p+ ylab("Relative abundance (%)") + xlab(NULL) + theme(legend.text=elemen
t_text(face='italic'),legend.position="right",strip.text.y = element_text(an
gle=0)) +guides(fill=guide_legend(ncol=1))

# Donor3
p <- ggplot(data=otuspec3,aes(x=LBM,y=as.numeric(as.character(value))))
p <- p +geom_bar(stat="identity",aes(fill=variable))
p <- papertheme(p) +facet_grid(pH~enrichment,drop=TRUE,scale="free_x",space="
free_x") + scale_fill_manual(values=thirtycolors,name="Species")
p <- p+ ylab("Relative abundance (%)") + xlab(NULL) + theme(legend.text=elemen
t_text(face='italic'),strip.text.y = element_text(angle=0),legend.position="
right") +guides(fill=guide_legend(ncol=1))

tiff("Figure4.tiff",width=16*dpi,height=14*dpi,res=dpi,compression="lzw")
cowplot::plot_grid(bargraph1genus,bargraph1species,nrow=2,rel_heights =c(0.5,
0.5),labels='AUTO',label_size=20,label_fontfamily='sans',align="v",axis="1")
dev.off()

## png
## 2

knitr::include_graphics("Figure4.tiff")

```



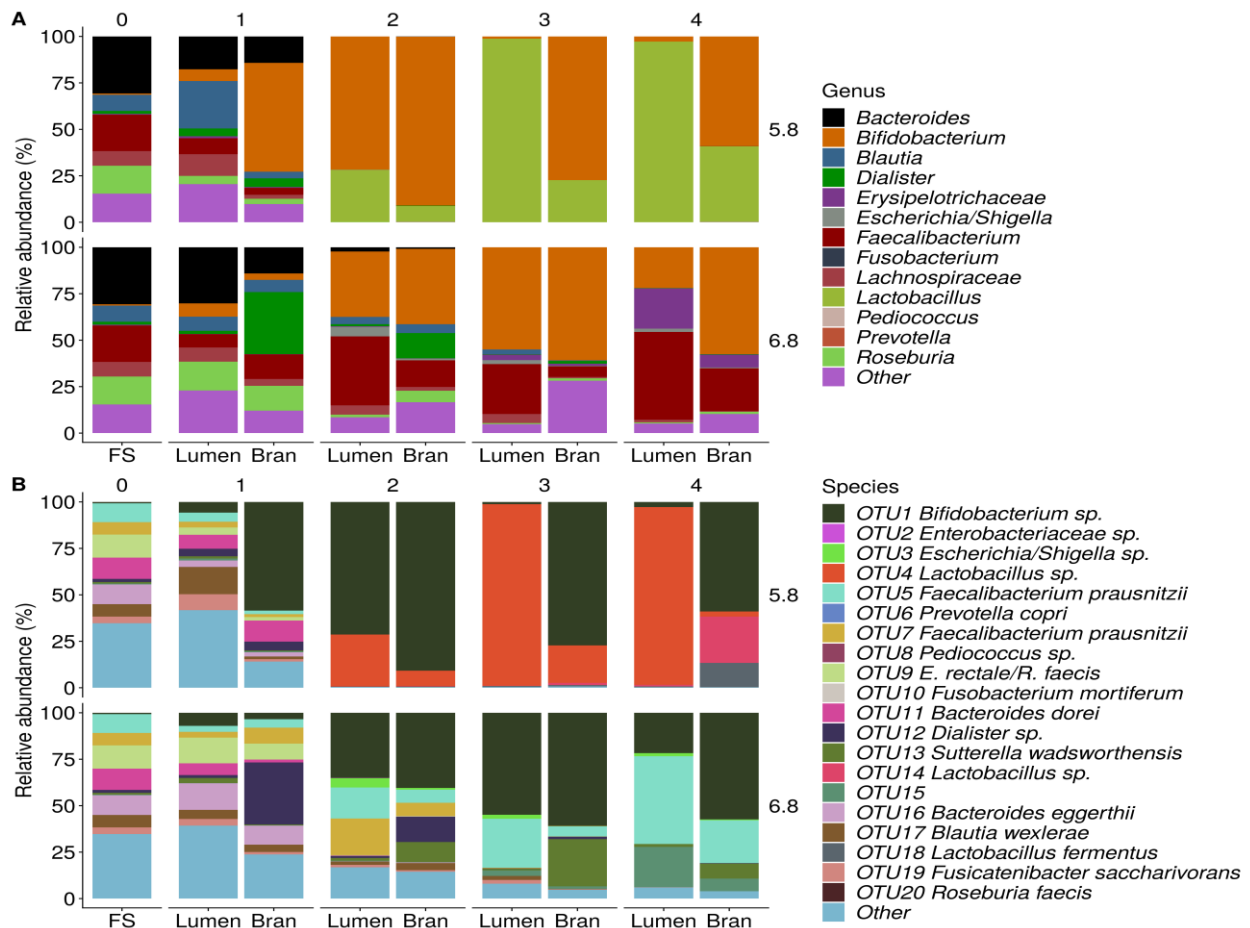

**Figure 4: Shifts in genus (A) and species (B) level microbial community composition of donor 1 during consecutive enrichment steps with wheat bran as the sole nutrient source.** The fecal sample (FS; enrichment step 0) was incubated with wheat bran for 24 h (enrichment step 1), after which the wheat bran residue was washed to remove loosely attached bacteria and used to seed a new incubation (enrichment step 2). This procedure was repeated two more times (enrichment step 3 and 4). Family level taxa appearing in the genus level plots should be interpreted as unclassified genus belonging to the respective family.

#### # Genus Level

```

otuspec<- genusotutab3
otuspec <- cbind(sampleinfo3,t(otuspec))
otuspec <- subset(otuspec,Enrichment=="4"|Enrichment=="0")
otuspec <- otuspec[,-c(1:length(colnames(sampleinfo3)))]
otuspec <- data.frame(t(otuspec))
selecttop20par <- rowSums(otuspec)
otuspec <- tibble::rownames_to_column(otuspec)
otuspec <- as.data.frame(otuspec %>% top_n(13,selecttop20par))
other <- 1-colSums(otuspec[, -1])
rownames(otuspec) <- otuspec$rowname
otuspec <- otuspec[, -1]

```

```

otuspec <- rbind(otuspec,other)
rownames(otuspec)[nrow(otuspec)] <- "Other"
otuspec <- 100*otuspec

sampleinfosub3 <- subset(sampleinfo3,Enrichment=="4" | Enrichment=="0")
otuspec <- mutate(as.data.frame(t(otuspec)),donor=sampleinfosub3$Donor,LBM=sa
mpleinfosub3$Lumen_bran,enrichment=sampleinfosub3$Enrichment,pH=sampleinfosub
3$pH,names=colnames(otuspec))
otuspec <- melt(otuspec,id.vars=c('donor','LBM','enrichment','pH','names'))
otuspec23 <- subset(otuspec,donor=="2" | donor=="3")
otuspec23$donor <- mapvalues(otuspec23$donor,from=c("2","3"),to=c("Donor2","D
onor3"))

p <- ggplot(data=otuspec23,aes(x=LBM,y=as.numeric(as.character(value))))
p <- p +geom_bar(stat="identity",aes(fill=variable))
p <- papertheme(p) +facet_grid(pH~donor,drop=TRUE,scale="free_x",space="free_
x") + scale_fill_manual(values=fifteencolors,name="Genus")
p <- p+ ylab("Relative abundance (%)") + xlab(NULL) + theme(legend.text=elemen
t_text(face='italic'),strip.text.y = element_text(angle=0),legend.position="
right") +guides(fill=guide_legend(ncol=1))
bargraph23genus <- p

# Species Level
otuspec<- otutab3[,-c(1:6)]
otuspec <- cbind(sampleinfo3,t(otuspec))
otuspec <- subset(otuspec,Enrichment=="4" | Enrichment=="0")
otuspec <- otuspec[,-c(1:length(colnames(sampleinfo3)))]
otuspec <- data.frame(t(otuspec))
selecttop20par <- rowSums(otuspec)
otuspec <- tibble::rownames_to_column(otuspec)
otuspec <- as.data.frame(otuspec %>% top_n(20,selecttop20par))
other <- 1-colSums(otuspec[,-1])
rownames(otuspec) <- otuspec$rowname
otuspec <- otuspec[,-1]
otuspec <- rbind(otuspec,other)
rownames(otuspec)[nrow(otuspec)] <- "Other"
otuspec <- 100*otuspec

sampleinfosub3 <- subset(sampleinfo3,Enrichment=="4" | Enrichment=="0")
otuspec <- mutate(as.data.frame(t(otuspec)),donor=sampleinfosub3$Donor,LBM=sa
mpleinfosub3$Lumen_bran,enrichment=sampleinfosub3$Enrichment,pH=sampleinfosub
3$pH,names=colnames(otuspec))
otuspec <- melt(otuspec,id.vars=c('donor','LBM','enrichment','pH','names'))
otuspec23 <- subset(otuspec,donor=="2" | donor=="3")
otuspec23$donor <- mapvalues(otuspec23$donor,from=c("2","3"),to=c("Donor2","D
onor3"))

p <- ggplot(data=otuspec23,aes(x=LBM,y=as.numeric(as.character(value))))
p <- p +geom_bar(stat="identity",aes(fill=variable))
p <- papertheme(p) +facet_grid(pH~donor,drop=TRUE,scale="free_x",space="free_

```

```
x") + scale_fill_manual(values=thirtycolors,name="Species",labels=label3donor
sillu)
p <- p+ ylab("Relative abundance (%)") + xlab(NULL) + theme(legend.text=element_text(face='italic'),strip.text.y = element_text(angle=0),legend.position="right") +guides(fill=guide_legend(ncol=1))
bargraph23species <- p

tiff("Figure5.tiff",width=12*dpi,height=16*dpi,res=dpi,compression="lzw")
cowplot::plot_grid(bargraph23genus,bargraph23species,nrow=2,rel_heights =c(0.5,0.5),labels='AUTO',label_size=20,label_fontfamily='sans',align="v",axis="1")
dev.off()

## png
## 2

include_graphics("Figure5.tiff")
```

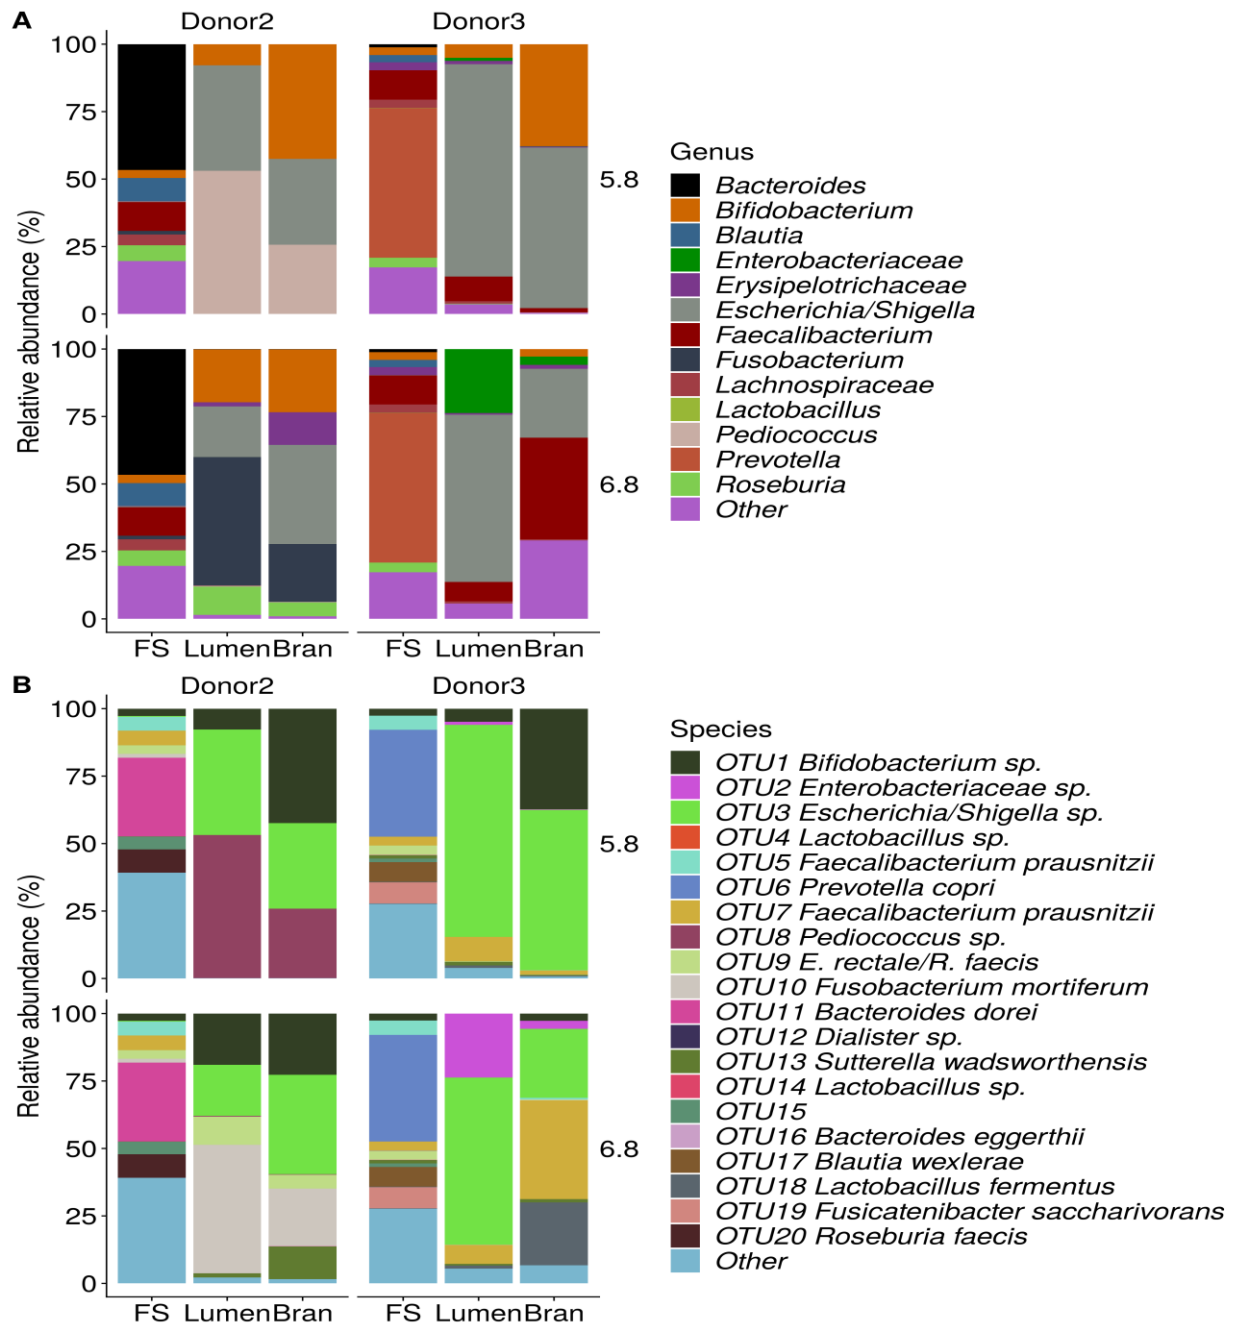

**Figure 5: Shifts in genus (A) and species (B) level microbial community composition of donor 2 and 3 after four enrichment steps with wheat bran as the sole nutrient source.** The fecal sample (FS; enrichment step 0) was incubated with wheat bran for 24 h (enrichment step 1), after which the wheat bran residue was washed to remove loosely attached bacteria and used to seed a new incubation (enrichment step 2). This procedure was repeated two more times (enrichment step 3 and 4). Only the final enrichment step and FS are shown in this plot. Family level taxa appearing in the genus level plots should be interpreted as unclassified genus belonging to the respective family.

```

# Define additional colors
fifteencolorsbis <- c("#C9A325", "#000000", "#CD6600", "#36648B", "#008B00", "#838B83", "#8B0000", "#323C4D", "#A03D44", "#98B736", "#7FCD50", "#BB5236", "#C8ADA4", "#AB5CC7", "#7A378B")

# Species level annotation of OTUs (verified by BLAST and RDP)
label4donorsillu <- c("OTU1 Escherichia/Shigella sp.", "OTU2 Bifidobacterium s p.", "OTU3 Faecalibacterium prausnitzii", "OTU4 Lactobacillus gasseri", "OTU5 Cl ostridium XVII", "OTU6 Lachnospiraceae sp.", "OTU7 Fusicatenibacter saccharivor ans", "OTU8 Clostridium XIVa sp.", "OTU9 Collinsella aerofaciens", "OTU10 Eubact erium rectale", "OTU11 Bacteroides vulgatus", "OTU12 Bifidobacterium longum", "O TU13 Gemmiger formicilis", "OTU14 Dialister invisus", "Other")

otuspec <- genusotutab4
selecttop20par <- rowSums(otuspec)
otuspec <- tibble::rownames_to_column(otuspec)
otuspec <- as.data.frame(otuspec %>% top_n(13, selecttop20par))
other <- 1-colSums(otuspec[, -1])
rownames(otuspec) <- otuspec$rowname
otuspec <- otuspec[, -1]
otuspec <- rbind(otuspec, other)
rownames(otuspec)[nrow(otuspec)] <- "Other"
otuspec <- otuspec*100

otuspec <- mutate(as.data.frame(t(otuspec)), donor=sampleinfo4$Donor, LBM=sampl einfo4$Lumen_bran, enrichment=sampleinfo4$Enrichment, pH=sampleinfo4$pH, names=c olnames(otuspec))
otuspec <- otuspec[c(5,6,9,10),]
otuspec4 <- melt(otuspec, id.vars=c('donor', 'LBM', 'enrichment', 'pH', 'names'))

p <- ggplot(data=otuspec4, aes(x=LBM, y=as.numeric(as.character(value))))
p <- p + geom_bar(stat="identity", aes(fill=variable))
p <- papertheme(p) + facet_grid(pH~., drop=TRUE, scale="free_x", space="free_x")
+ scale_fill_manual(values=fifteencolorsbis, name="Genus")
p <- p + ylab("Relative abundance (%)") + xlab(NULL) + theme(legend.text=elemen t_text(face='italic'), legend.position="right", strip.text.y = element_text(an gle=0)) + guides(fill=guide_legend(ncol=1))
bargraph4genus <- p

# Species
otuspec <- otutab4[, -c(1:6)]
selecttop20par <- rowSums(otuspec)
otuspec <- tibble::rownames_to_column(otuspec)
otuspec <- as.data.frame(otuspec %>% top_n(14, selecttop20par))
other <- 1-colSums(otuspec[, -1])
rownames(otuspec) <- otuspec$rowname
otuspec <- otuspec[, -1]
otuspec <- rbind(otuspec, other)
rownames(otuspec)[nrow(otuspec)] <- "Other"
otuspec <- otuspec*100

```

```

otuspec <- mutate(as.data.frame(t(otuspec)),donor=sampleinfo4$Donor,LBM=sampleinfo4$Lumen_bran,enrichment=sampleinfo4$Enrichment,pH=sampleinfo4$pH,names=colnames(otuspec))
otuspec <- otuspec[c(5,6,9,10),]
otuspec4 <- melt(otuspec,id.vars=c('donor','LBM','enrichment','pH','names'))

p <- ggplot(data=otuspec4,aes(x=LBM,y=as.numeric(as.character(value))))
p <- p +geom_bar(stat="identity",aes(fill=variable))
p <- papertheme(p) +facet_grid(pH~.,drop=TRUE,scale="free_x",space="free_x")
+ scale_fill_manual(values=thirtycolors,name="Species",label=label4donorsillum)
)
p <- p+ ylab("Relative abundance (%)") + xlab(NULL) + theme(legend.text=element_text(face='italic'),legend.position="right",strip.text.y = element_text(angle=0)) +guides(fill=guide_legend(ncol=1))
bargraph4species <- p

tiff("Figure6.tiff",width=12*dpi,height=10*dpi,res=dpi,compression="lzw")
cowplot::plot_grid(bargraph4genus,bargraph4species,nrow=2,rel_heights =c(0.5,0.5),labels='AUTO',label_size=20,label_fontfamily='sans',align="v",axis="1")
dev.off()

## png
## 2

include_graphics("Figure6.tiff")

```

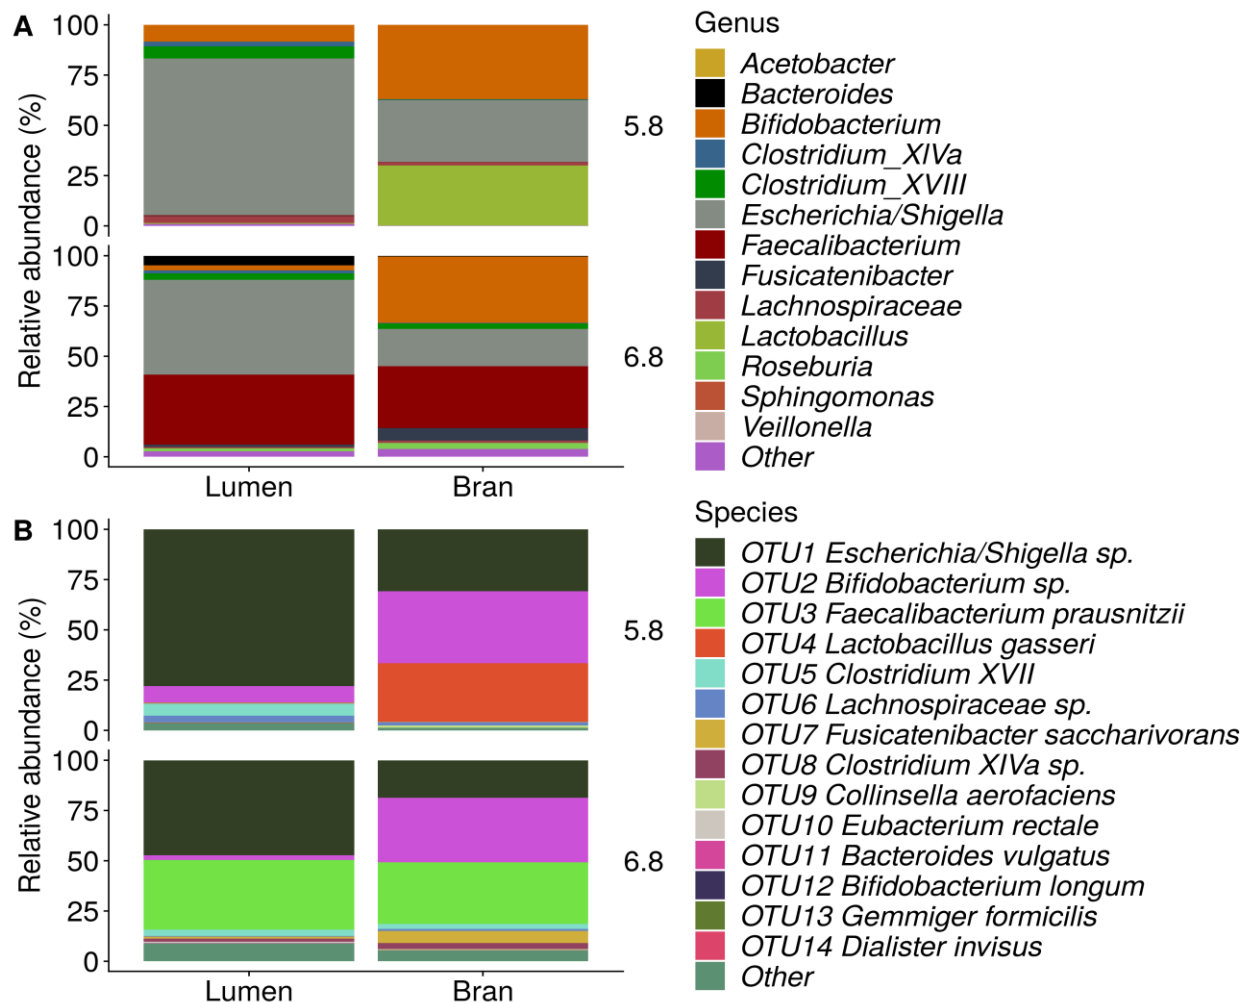

**Figure 6: Genus (A) and species (B) level microbial community composition of donor 4 after the final enrichment step with wheat bran as the sole nutrient source.** The fecal sample (FS; enrichment step 0) was incubated with wheat bran for 24 h (enrichment step 1), after which the wheat bran residue was washed to remove loosely attached bacteria and used to seed a new incubation (enrichment step 2). This procedure was repeated two more times (enrichment step 3 and 4). Only the final enrichment step was shown in this plot, due to a low read number (<100 reads) in the fecal sample. Family level taxa appearing in the genus level plots should be interpreted as unclassified genus belonging to the respective family.

## Build consensus sanger sequences

The OTUs, resulting from 16S rRNA gene amplicon sequencing of the consecutive enrichments were compared to the 16S rRNA gene Sanger reads of the obtained isolates by means of a phylogenetic placement analysis. Forward and reverse Sanger sequences for each donor were grouped into separate files and reverse complements and summary statistics were obtained using the mothur software package (v.1.39.5) (Schloss et al. 2009). The 515F-806R primer pair, used for Illumina MiSeq 16S rRNA gene amplicon sequencing was located



in the Sanger reads (forward and reverse compliment). In case both primers were not present on one and the same read (either forward, or reverse), consensus sequences (contigs) were generated using the sangeranalyseR package (version 0.1.0) (Lanfeard 2015). Contigs with more than 100 degenerated positions, indicative of a poor quality alignment, were omitted.

```
# Summarize data
sf = summarise.abi.folder("Sanger_isolates")

## [1] "Looking for .ab1 files..."
## [1] "Found 256 .ab1 files..."
## [1] "Loading reads..."
## [1] "Calculating read summaries..."
## [1] "Cleaning up"

sf$summaries

##           file.path      folder.name  file.name  raw.length
## 1 Sanger_isolates/100F.F.ab1 Sanger_isolates 100F.F.ab1      891
## 2 Sanger_isolates/100R.R.ab1 Sanger_isolates 100R.R.ab1      485
## 3 Sanger_isolates/101F.F.ab1 Sanger_isolates 101F.F.ab1      793
## 4 Sanger_isolates/101R.R.ab1 Sanger_isolates 101R.R.ab1     1128
## 5 Sanger_isolates/102F.F.ab1 Sanger_isolates 102F.F.ab1     1164
## 6 Sanger_isolates/102R.R.ab1 Sanger_isolates 102R.R.ab1     1100
## 7 Sanger_isolates/103F.F.ab1 Sanger_isolates 103F.F.ab1     1117
## 8 Sanger_isolates/103R.R.ab1 Sanger_isolates 103R.R.ab1     1115
## 9 Sanger_isolates/104F.F.ab1 Sanger_isolates 104F.F.ab1     1165
## 10 Sanger_isolates/104R.R.ab1 Sanger_isolates 104R.R.ab1     1166
## 11 Sanger_isolates/105F.F.ab1 Sanger_isolates 105F.F.ab1     1074
## 12 Sanger_isolates/105R.R.ab1 Sanger_isolates 105R.R.ab1      805
## 13 Sanger_isolates/106F.F.ab1 Sanger_isolates 106F.F.ab1      894
## 14 Sanger_isolates/106R.R.ab1 Sanger_isolates 106R.R.ab1     1116
## 15 Sanger_isolates/107F.F.ab1 Sanger_isolates 107F.F.ab1     1021
## 16 Sanger_isolates/107R.R.ab1 Sanger_isolates 107R.R.ab1     1133
## 17 Sanger_isolates/108F.F.ab1 Sanger_isolates 108F.F.ab1      962
## 18 Sanger_isolates/108R.R.ab1 Sanger_isolates 108R.R.ab1     1088
## 19 Sanger_isolates/109F.F.ab1 Sanger_isolates 109F.F.ab1     1126
## 20 Sanger_isolates/109R.R.ab1 Sanger_isolates 109R.R.ab1     1148
## 21 Sanger_isolates/10F.F.ab1 Sanger_isolates 10F.F.ab1     1045
## 22 Sanger_isolates/10R.R.ab1 Sanger_isolates 10R.R.ab1     1104
## 23 Sanger_isolates/110F.F.ab1 Sanger_isolates 110F.F.ab1      876
## 24 Sanger_isolates/110R.R.ab1 Sanger_isolates 110R.R.ab1     1033
## 25 Sanger_isolates/11F.F.ab1 Sanger_isolates 11F.F.ab1      546
## 26 Sanger_isolates/11R.R.ab1 Sanger_isolates 11R.R.ab1      683
## 27 Sanger_isolates/128F.F.ab1 Sanger_isolates 128F.F.ab1     1017
## 28 Sanger_isolates/128R.R.ab1 Sanger_isolates 128R.R.ab1     1196
## 29 Sanger_isolates/129F.F.ab1 Sanger_isolates 129F.F.ab1      711
## 30 Sanger_isolates/129R.R.ab1 Sanger_isolates 129R.R.ab1     1073
## 31 Sanger_isolates/130F.F.ab1 Sanger_isolates 130F.F.ab1      546
## 32 Sanger_isolates/130R.R.ab1 Sanger_isolates 130R.R.ab1      489
## 33 Sanger_isolates/131F.F.ab1 Sanger_isolates 131F.F.ab1      977
```



|       |                            |                 |            |      |
|-------|----------------------------|-----------------|------------|------|
| ## 34 | Sanger_isolates/131R.R.ab1 | Sanger_isolates | 131R.R.ab1 | 1105 |
| ## 35 | Sanger_isolates/132F.F.ab1 | Sanger_isolates | 132F.F.ab1 | 200  |
| ## 36 | Sanger_isolates/132R.R.ab1 | Sanger_isolates | 132R.R.ab1 | 199  |
| ## 37 | Sanger_isolates/133F.F.ab1 | Sanger_isolates | 133F.F.ab1 | 199  |
| ## 38 | Sanger_isolates/133R.R.ab1 | Sanger_isolates | 133R.R.ab1 | 1001 |
| ## 39 | Sanger_isolates/134F.F.ab1 | Sanger_isolates | 134F.F.ab1 | 287  |
| ## 40 | Sanger_isolates/134R.R.ab1 | Sanger_isolates | 134R.R.ab1 | 341  |
| ## 41 | Sanger_isolates/135F.F.ab1 | Sanger_isolates | 135F.F.ab1 | 993  |
| ## 42 | Sanger_isolates/135R.R.ab1 | Sanger_isolates | 135R.R.ab1 | 129  |
| ## 43 | Sanger_isolates/136F.F.ab1 | Sanger_isolates | 136F.F.ab1 | 920  |
| ## 44 | Sanger_isolates/136R.R.ab1 | Sanger_isolates | 136R.R.ab1 | 1109 |
| ## 45 | Sanger_isolates/137F.F.ab1 | Sanger_isolates | 137F.F.ab1 | 735  |
| ## 46 | Sanger_isolates/137R.R.ab1 | Sanger_isolates | 137R.R.ab1 | 691  |
| ## 47 | Sanger_isolates/138F.F.ab1 | Sanger_isolates | 138F.F.ab1 | 714  |
| ## 48 | Sanger_isolates/138R.R.ab1 | Sanger_isolates | 138R.R.ab1 | 872  |
| ## 49 | Sanger_isolates/139F.F.ab1 | Sanger_isolates | 139F.F.ab1 | 610  |
| ## 50 | Sanger_isolates/139R.R.ab1 | Sanger_isolates | 139R.R.ab1 | 382  |
| ## 51 | Sanger_isolates/13F.F.ab1  | Sanger_isolates | 13F.F.ab1  | 604  |
| ## 52 | Sanger_isolates/13R.R.ab1  | Sanger_isolates | 13R.R.ab1  | 957  |
| ## 53 | Sanger_isolates/140F.F.ab1 | Sanger_isolates | 140F.F.ab1 | 542  |
| ## 54 | Sanger_isolates/140R.R.ab1 | Sanger_isolates | 140R.R.ab1 | 943  |
| ## 55 | Sanger_isolates/141F.F.ab1 | Sanger_isolates | 141F.F.ab1 | 1060 |
| ## 56 | Sanger_isolates/141R.R.ab1 | Sanger_isolates | 141R.R.ab1 | 779  |
| ## 57 | Sanger_isolates/142F.F.ab1 | Sanger_isolates | 142F.F.ab1 | 680  |
| ## 58 | Sanger_isolates/142R.R.ab1 | Sanger_isolates | 142R.R.ab1 | 707  |
| ## 59 | Sanger_isolates/143F.F.ab1 | Sanger_isolates | 143F.F.ab1 | 1067 |
| ## 60 | Sanger_isolates/143R.R.ab1 | Sanger_isolates | 143R.R.ab1 | 1019 |
| ## 61 | Sanger_isolates/144F.F.ab1 | Sanger_isolates | 144F.F.ab1 | 905  |
| ## 62 | Sanger_isolates/144R.R.ab1 | Sanger_isolates | 144R.R.ab1 | 1059 |
| ## 63 | Sanger_isolates/145F.F.ab1 | Sanger_isolates | 145F.F.ab1 | 1049 |
| ## 64 | Sanger_isolates/145R.R.ab1 | Sanger_isolates | 145R.R.ab1 | 650  |
| ## 65 | Sanger_isolates/146F.F.ab1 | Sanger_isolates | 146F.F.ab1 | 1121 |
| ## 66 | Sanger_isolates/146R.R.ab1 | Sanger_isolates | 146R.R.ab1 | 1145 |
| ## 67 | Sanger_isolates/147F.F.ab1 | Sanger_isolates | 147F.F.ab1 | 1002 |
| ## 68 | Sanger_isolates/147R.R.ab1 | Sanger_isolates | 147R.R.ab1 | 1050 |
| ## 69 | Sanger_isolates/148F.F.ab1 | Sanger_isolates | 148F.F.ab1 | 736  |
| ## 70 | Sanger_isolates/148R.R.ab1 | Sanger_isolates | 148R.R.ab1 | 390  |
| ## 71 | Sanger_isolates/149F.F.ab1 | Sanger_isolates | 149F.F.ab1 | 660  |
| ## 72 | Sanger_isolates/149R.R.ab1 | Sanger_isolates | 149R.R.ab1 | 1139 |
| ## 73 | Sanger_isolates/150F.F.ab1 | Sanger_isolates | 150F.F.ab1 | 505  |
| ## 74 | Sanger_isolates/150R.R.ab1 | Sanger_isolates | 150R.R.ab1 | 937  |
| ## 75 | Sanger_isolates/151F.F.ab1 | Sanger_isolates | 151F.F.ab1 | 706  |
| ## 76 | Sanger_isolates/151R.R.ab1 | Sanger_isolates | 151R.R.ab1 | 999  |
| ## 77 | Sanger_isolates/152F.F.ab1 | Sanger_isolates | 152F.F.ab1 | 614  |
| ## 78 | Sanger_isolates/152R.R.ab1 | Sanger_isolates | 152R.R.ab1 | 843  |
| ## 79 | Sanger_isolates/153F.F.ab1 | Sanger_isolates | 153F.F.ab1 | 703  |
| ## 80 | Sanger_isolates/153R.R.ab1 | Sanger_isolates | 153R.R.ab1 | 933  |
| ## 81 | Sanger_isolates/154F.F.ab1 | Sanger_isolates | 154F.F.ab1 | 943  |
| ## 82 | Sanger_isolates/154R.R.ab1 | Sanger_isolates | 154R.R.ab1 | 1221 |
| ## 83 | Sanger_isolates/155F.F.ab1 | Sanger_isolates | 155F.F.ab1 | 752  |

|        |                            |                 |            |      |
|--------|----------------------------|-----------------|------------|------|
| ## 84  | Sanger_isolates/155R.R.ab1 | Sanger_isolates | 155R.R.ab1 | 1122 |
| ## 85  | Sanger_isolates/156F.F.ab1 | Sanger_isolates | 156F.F.ab1 | 610  |
| ## 86  | Sanger_isolates/156R.R.ab1 | Sanger_isolates | 156R.R.ab1 | 1034 |
| ## 87  | Sanger_isolates/157F.F.ab1 | Sanger_isolates | 157F.F.ab1 | 712  |
| ## 88  | Sanger_isolates/157R.R.ab1 | Sanger_isolates | 157R.R.ab1 | 1115 |
| ## 89  | Sanger_isolates/158F.F.ab1 | Sanger_isolates | 158F.F.ab1 | 874  |
| ## 90  | Sanger_isolates/158R.R.ab1 | Sanger_isolates | 158R.R.ab1 | 990  |
| ## 91  | Sanger_isolates/159F.F.ab1 | Sanger_isolates | 159F.F.ab1 | 702  |
| ## 92  | Sanger_isolates/159R.R.ab1 | Sanger_isolates | 159R.R.ab1 | 1103 |
| ## 93  | Sanger_isolates/15F.F.ab1  | Sanger_isolates | 15F.F.ab1  | 829  |
| ## 94  | Sanger_isolates/15R.R.ab1  | Sanger_isolates | 15R.R.ab1  | 923  |
| ## 95  | Sanger_isolates/160F.F.ab1 | Sanger_isolates | 160F.F.ab1 | 778  |
| ## 96  | Sanger_isolates/160R.R.ab1 | Sanger_isolates | 160R.R.ab1 | 1157 |
| ## 97  | Sanger_isolates/161F.F.ab1 | Sanger_isolates | 161F.F.ab1 | 796  |
| ## 98  | Sanger_isolates/161R.R.ab1 | Sanger_isolates | 161R.R.ab1 | 1015 |
| ## 99  | Sanger_isolates/162F.F.ab1 | Sanger_isolates | 162F.F.ab1 | 665  |
| ## 100 | Sanger_isolates/162R.R.ab1 | Sanger_isolates | 162R.R.ab1 | 581  |
| ## 101 | Sanger_isolates/163F.F.ab1 | Sanger_isolates | 163F.F.ab1 | 806  |
| ## 102 | Sanger_isolates/163R.R.ab1 | Sanger_isolates | 163R.R.ab1 | 837  |
| ## 103 | Sanger_isolates/181F.F.ab1 | Sanger_isolates | 181F.F.ab1 | 1149 |
| ## 104 | Sanger_isolates/181R.R.ab1 | Sanger_isolates | 181R.R.ab1 | 1188 |
| ## 105 | Sanger_isolates/182F.F.ab1 | Sanger_isolates | 182F.F.ab1 | 1050 |
| ## 106 | Sanger_isolates/182R.R.ab1 | Sanger_isolates | 182R.R.ab1 | 815  |
| ## 107 | Sanger_isolates/183F.F.ab1 | Sanger_isolates | 183F.F.ab1 | 1044 |
| ## 108 | Sanger_isolates/183R.R.ab1 | Sanger_isolates | 183R.R.ab1 | 1190 |
| ## 109 | Sanger_isolates/184F.F.ab1 | Sanger_isolates | 184F.F.ab1 | 916  |
| ## 110 | Sanger_isolates/184R.R.ab1 | Sanger_isolates | 184R.R.ab1 | 1151 |
| ## 111 | Sanger_isolates/185F.F.ab1 | Sanger_isolates | 185F.F.ab1 | 757  |
| ## 112 | Sanger_isolates/185R.R.ab1 | Sanger_isolates | 185R.R.ab1 | 1147 |
| ## 113 | Sanger_isolates/186F.F.ab1 | Sanger_isolates | 186F.F.ab1 | 595  |
| ## 114 | Sanger_isolates/186R.R.ab1 | Sanger_isolates | 186R.R.ab1 | 1023 |
| ## 115 | Sanger_isolates/187F.F.ab1 | Sanger_isolates | 187F.F.ab1 | 1142 |
| ## 116 | Sanger_isolates/187R.R.ab1 | Sanger_isolates | 187R.R.ab1 | 1131 |
| ## 117 | Sanger_isolates/188F.F.ab1 | Sanger_isolates | 188F.F.ab1 | 1095 |
| ## 118 | Sanger_isolates/188R.R.ab1 | Sanger_isolates | 188R.R.ab1 | 1023 |
| ## 119 | Sanger_isolates/189F.F.ab1 | Sanger_isolates | 189F.F.ab1 | 1049 |
| ## 120 | Sanger_isolates/189R.R.ab1 | Sanger_isolates | 189R.R.ab1 | 1029 |
| ## 121 | Sanger_isolates/18F.F.ab1  | Sanger_isolates | 18F.F.ab1  | 655  |
| ## 122 | Sanger_isolates/18R.R.ab1  | Sanger_isolates | 18R.R.ab1  | 999  |
| ## 123 | Sanger_isolates/190F.F.ab1 | Sanger_isolates | 190F.F.ab1 | 1063 |
| ## 124 | Sanger_isolates/190R.R.ab1 | Sanger_isolates | 190R.R.ab1 | 709  |
| ## 125 | Sanger_isolates/191F.F.ab1 | Sanger_isolates | 191F.F.ab1 | 1021 |
| ## 126 | Sanger_isolates/191R.R.ab1 | Sanger_isolates | 191R.R.ab1 | 1153 |
| ## 127 | Sanger_isolates/192F.F.ab1 | Sanger_isolates | 192F.F.ab1 | 1208 |
| ## 128 | Sanger_isolates/192R.R.ab1 | Sanger_isolates | 192R.R.ab1 | 1157 |
| ## 129 | Sanger_isolates/193F.F.ab1 | Sanger_isolates | 193F.F.ab1 | 1009 |
| ## 130 | Sanger_isolates/193R.R.ab1 | Sanger_isolates | 193R.R.ab1 | 1121 |
| ## 131 | Sanger_isolates/194F.F.ab1 | Sanger_isolates | 194F.F.ab1 | 1020 |
| ## 132 | Sanger_isolates/194R.R.ab1 | Sanger_isolates | 194R.R.ab1 | 1137 |
| ## 133 | Sanger_isolates/195F.F.ab1 | Sanger_isolates | 195F.F.ab1 | 1091 |

|        |                            |                 |            |      |
|--------|----------------------------|-----------------|------------|------|
| ## 134 | Sanger_isolates/195R.R.ab1 | Sanger_isolates | 195R.R.ab1 | 1107 |
| ## 135 | Sanger_isolates/196F.F.ab1 | Sanger_isolates | 196F.F.ab1 | 1175 |
| ## 136 | Sanger_isolates/196R.R.ab1 | Sanger_isolates | 196R.R.ab1 | 1095 |
| ## 137 | Sanger_isolates/197F.F.ab1 | Sanger_isolates | 197F.F.ab1 | 676  |
| ## 138 | Sanger_isolates/197R.R.ab1 | Sanger_isolates | 197R.R.ab1 | 1179 |
| ## 139 | Sanger_isolates/198F.F.ab1 | Sanger_isolates | 198F.F.ab1 | 1100 |
| ## 140 | Sanger_isolates/198R.R.ab1 | Sanger_isolates | 198R.R.ab1 | 928  |
| ## 141 | Sanger_isolates/199F.F.ab1 | Sanger_isolates | 199F.F.ab1 | 609  |
| ## 142 | Sanger_isolates/199R.R.ab1 | Sanger_isolates | 199R.R.ab1 | 906  |
| ## 143 | Sanger_isolates/19F.F.ab1  | Sanger_isolates | 19F.F.ab1  | 1060 |
| ## 144 | Sanger_isolates/19R.R.ab1  | Sanger_isolates | 19R.R.ab1  | 1160 |
| ## 145 | Sanger_isolates/200F.F.ab1 | Sanger_isolates | 200F.F.ab1 | 1217 |
| ## 146 | Sanger_isolates/200R.R.ab1 | Sanger_isolates | 200R.R.ab1 | 368  |
| ## 147 | Sanger_isolates/201F.F.ab1 | Sanger_isolates | 201F.F.ab1 | 1183 |
| ## 148 | Sanger_isolates/201R.R.ab1 | Sanger_isolates | 201R.R.ab1 | 965  |
| ## 149 | Sanger_isolates/202F.F.ab1 | Sanger_isolates | 202F.F.ab1 | 1227 |
| ## 150 | Sanger_isolates/202R.R.ab1 | Sanger_isolates | 202R.R.ab1 | 1117 |
| ## 151 | Sanger_isolates/203F.F.ab1 | Sanger_isolates | 203F.F.ab1 | 482  |
| ## 152 | Sanger_isolates/203R.R.ab1 | Sanger_isolates | 203R.R.ab1 | 987  |
| ## 153 | Sanger_isolates/204F.F.ab1 | Sanger_isolates | 204F.F.ab1 | 603  |
| ## 154 | Sanger_isolates/204R.R.ab1 | Sanger_isolates | 204R.R.ab1 | 584  |
| ## 155 | Sanger_isolates/205F.F.ab1 | Sanger_isolates | 205F.F.ab1 | 487  |
| ## 156 | Sanger_isolates/205R.R.ab1 | Sanger_isolates | 205R.R.ab1 | 566  |
| ## 157 | Sanger_isolates/206F.F.ab1 | Sanger_isolates | 206F.F.ab1 | 1183 |
| ## 158 | Sanger_isolates/206R.R.ab1 | Sanger_isolates | 206R.R.ab1 | 1190 |
| ## 159 | Sanger_isolates/21F.F.ab1  | Sanger_isolates | 21F.F.ab1  | 903  |
| ## 160 | Sanger_isolates/21R.R.ab1  | Sanger_isolates | 21R.R.ab1  | 918  |
| ## 161 | Sanger_isolates/25F.F.ab1  | Sanger_isolates | 25F.F.ab1  | 904  |
| ## 162 | Sanger_isolates/25R.R.ab1  | Sanger_isolates | 25R.R.ab1  | 931  |
| ## 163 | Sanger_isolates/26F.F.ab1  | Sanger_isolates | 26F.F.ab1  | 1127 |
| ## 164 | Sanger_isolates/26R.R.ab1  | Sanger_isolates | 26R.R.ab1  | 813  |
| ## 165 | Sanger_isolates/27F.F.ab1  | Sanger_isolates | 27F.F.ab1  | 966  |
| ## 166 | Sanger_isolates/27R.R.ab1  | Sanger_isolates | 27R.R.ab1  | 824  |
| ## 167 | Sanger_isolates/28F.F.ab1  | Sanger_isolates | 28F.F.ab1  | 908  |
| ## 168 | Sanger_isolates/28R.R.ab1  | Sanger_isolates | 28R.R.ab1  | 1017 |
| ## 169 | Sanger_isolates/29F.F.ab1  | Sanger_isolates | 29F.F.ab1  | 966  |
| ## 170 | Sanger_isolates/29R.R.ab1  | Sanger_isolates | 29R.R.ab1  | 1109 |
| ## 171 | Sanger_isolates/30F.F.ab1  | Sanger_isolates | 30F.F.ab1  | 914  |
| ## 172 | Sanger_isolates/30R.R.ab1  | Sanger_isolates | 30R.R.ab1  | 945  |
| ## 173 | Sanger_isolates/31F.F.ab1  | Sanger_isolates | 31F.F.ab1  | 970  |
| ## 174 | Sanger_isolates/31R.R.ab1  | Sanger_isolates | 31R.R.ab1  | 999  |
| ## 175 | Sanger_isolates/32F.F.ab1  | Sanger_isolates | 32F.F.ab1  | 1045 |
| ## 176 | Sanger_isolates/32R.R.ab1  | Sanger_isolates | 32R.R.ab1  | 1234 |
| ## 177 | Sanger_isolates/33F.F.ab1  | Sanger_isolates | 33F.F.ab1  | 996  |
| ## 178 | Sanger_isolates/33R.R.ab1  | Sanger_isolates | 33R.R.ab1  | 825  |
| ## 179 | Sanger_isolates/34F.F.ab1  | Sanger_isolates | 34F.F.ab1  | 933  |
| ## 180 | Sanger_isolates/34R.R.ab1  | Sanger_isolates | 34R.R.ab1  | 1143 |
| ## 181 | Sanger_isolates/35F.F.ab1  | Sanger_isolates | 35F.F.ab1  | 920  |
| ## 182 | Sanger_isolates/35R.R.ab1  | Sanger_isolates | 35R.R.ab1  | 1161 |
| ## 183 | Sanger_isolates/36F.F.ab1  | Sanger_isolates | 36F.F.ab1  | 843  |

|        |                           |                 |           |      |
|--------|---------------------------|-----------------|-----------|------|
| ## 184 | Sanger_isolates/36R.R.ab1 | Sanger_isolates | 36R.R.ab1 | 1091 |
| ## 185 | Sanger_isolates/37F.F.ab1 | Sanger_isolates | 37F.F.ab1 | 942  |
| ## 186 | Sanger_isolates/37R.R.ab1 | Sanger_isolates | 37R.R.ab1 | 1018 |
| ## 187 | Sanger_isolates/38F.F.ab1 | Sanger_isolates | 38F.F.ab1 | 771  |
| ## 188 | Sanger_isolates/38R.R.ab1 | Sanger_isolates | 38R.R.ab1 | 610  |
| ## 189 | Sanger_isolates/39F.F.ab1 | Sanger_isolates | 39F.F.ab1 | 481  |
| ## 190 | Sanger_isolates/39R.R.ab1 | Sanger_isolates | 39R.R.ab1 | 460  |
| ## 191 | Sanger_isolates/40F.F.ab1 | Sanger_isolates | 40F.F.ab1 | 1039 |
| ## 192 | Sanger_isolates/40R.R.ab1 | Sanger_isolates | 40R.R.ab1 | 1046 |
| ## 193 | Sanger_isolates/41F.F.ab1 | Sanger_isolates | 41F.F.ab1 | 1172 |
| ## 194 | Sanger_isolates/41R.R.ab1 | Sanger_isolates | 41R.R.ab1 | 1114 |
| ## 195 | Sanger_isolates/42F.F.ab1 | Sanger_isolates | 42F.F.ab1 | 988  |
| ## 196 | Sanger_isolates/42R.R.ab1 | Sanger_isolates | 42R.R.ab1 | 980  |
| ## 197 | Sanger_isolates/43F.F.ab1 | Sanger_isolates | 43F.F.ab1 | 1119 |
| ## 198 | Sanger_isolates/43R.R.ab1 | Sanger_isolates | 43R.R.ab1 | 1164 |
| ## 199 | Sanger_isolates/44F.F.ab1 | Sanger_isolates | 44F.F.ab1 | 956  |
| ## 200 | Sanger_isolates/44R.R.ab1 | Sanger_isolates | 44R.R.ab1 | 1067 |
| ## 201 | Sanger_isolates/45F.F.ab1 | Sanger_isolates | 45F.F.ab1 | 1088 |
| ## 202 | Sanger_isolates/45R.R.ab1 | Sanger_isolates | 45R.R.ab1 | 878  |
| ## 203 | Sanger_isolates/46F.F.ab1 | Sanger_isolates | 46F.F.ab1 | 990  |
| ## 204 | Sanger_isolates/46R.R.ab1 | Sanger_isolates | 46R.R.ab1 | 1086 |
| ## 205 | Sanger_isolates/47F.F.ab1 | Sanger_isolates | 47F.F.ab1 | 752  |
| ## 206 | Sanger_isolates/47R.R.ab1 | Sanger_isolates | 47R.R.ab1 | 582  |
| ## 207 | Sanger_isolates/48F.F.ab1 | Sanger_isolates | 48F.F.ab1 | 1157 |
| ## 208 | Sanger_isolates/48R.R.ab1 | Sanger_isolates | 48R.R.ab1 | 200  |
| ## 209 | Sanger_isolates/76F.F.ab1 | Sanger_isolates | 76F.F.ab1 | 1138 |
| ## 210 | Sanger_isolates/76R.R.ab1 | Sanger_isolates | 76R.R.ab1 | 1168 |
| ## 211 | Sanger_isolates/77F.F.ab1 | Sanger_isolates | 77F.F.ab1 | 1095 |
| ## 212 | Sanger_isolates/77R.R.ab1 | Sanger_isolates | 77R.R.ab1 | 1111 |
| ## 213 | Sanger_isolates/78F.F.ab1 | Sanger_isolates | 78F.F.ab1 | 944  |
| ## 214 | Sanger_isolates/78R.R.ab1 | Sanger_isolates | 78R.R.ab1 | 1180 |
| ## 215 | Sanger_isolates/79F.F.ab1 | Sanger_isolates | 79F.F.ab1 | 528  |
| ## 216 | Sanger_isolates/79R.R.ab1 | Sanger_isolates | 79R.R.ab1 | 966  |
| ## 217 | Sanger_isolates/80F.F.ab1 | Sanger_isolates | 80F.F.ab1 | 638  |
| ## 218 | Sanger_isolates/80R.R.ab1 | Sanger_isolates | 80R.R.ab1 | 999  |
| ## 219 | Sanger_isolates/81F.F.ab1 | Sanger_isolates | 81F.F.ab1 | 801  |
| ## 220 | Sanger_isolates/81R.R.ab1 | Sanger_isolates | 81R.R.ab1 | 1031 |
| ## 221 | Sanger_isolates/82F.F.ab1 | Sanger_isolates | 82F.F.ab1 | 891  |
| ## 222 | Sanger_isolates/82R.R.ab1 | Sanger_isolates | 82R.R.ab1 | 1129 |
| ## 223 | Sanger_isolates/83F.F.ab1 | Sanger_isolates | 83F.F.ab1 | 637  |
| ## 224 | Sanger_isolates/83R.R.ab1 | Sanger_isolates | 83R.R.ab1 | 915  |
| ## 225 | Sanger_isolates/84F.F.ab1 | Sanger_isolates | 84F.F.ab1 | 515  |
| ## 226 | Sanger_isolates/84R.R.ab1 | Sanger_isolates | 84R.R.ab1 | 1088 |
| ## 227 | Sanger_isolates/85F.F.ab1 | Sanger_isolates | 85F.F.ab1 | 525  |
| ## 228 | Sanger_isolates/85R.R.ab1 | Sanger_isolates | 85R.R.ab1 | 1072 |
| ## 229 | Sanger_isolates/86F.F.ab1 | Sanger_isolates | 86F.F.ab1 | 513  |
| ## 230 | Sanger_isolates/86R.R.ab1 | Sanger_isolates | 86R.R.ab1 | 1104 |
| ## 231 | Sanger_isolates/87F.F.ab1 | Sanger_isolates | 87F.F.ab1 | 699  |
| ## 232 | Sanger_isolates/87R.R.ab1 | Sanger_isolates | 87R.R.ab1 | 1022 |
| ## 233 | Sanger_isolates/88F.F.ab1 | Sanger_isolates | 88F.F.ab1 | 990  |

|    |     |                           |                 |             |                     |
|----|-----|---------------------------|-----------------|-------------|---------------------|
| ## | 234 | Sanger_isolates/88R.R.ab1 | Sanger_isolates | 88R.R.ab1   | 820                 |
| ## | 235 | Sanger_isolates/89F.F.ab1 | Sanger_isolates | 89F.F.ab1   | 628                 |
| ## | 236 | Sanger_isolates/89R.R.ab1 | Sanger_isolates | 89R.R.ab1   | 916                 |
| ## | 237 | Sanger_isolates/90F.F.ab1 | Sanger_isolates | 90F.F.ab1   | 950                 |
| ## | 238 | Sanger_isolates/90R.R.ab1 | Sanger_isolates | 90R.R.ab1   | 1182                |
| ## | 239 | Sanger_isolates/91F.F.ab1 | Sanger_isolates | 91F.F.ab1   | 973                 |
| ## | 240 | Sanger_isolates/91R.R.ab1 | Sanger_isolates | 91R.R.ab1   | 1112                |
| ## | 241 | Sanger_isolates/92F.F.ab1 | Sanger_isolates | 92F.F.ab1   | 988                 |
| ## | 242 | Sanger_isolates/92R.R.ab1 | Sanger_isolates | 92R.R.ab1   | 1127                |
| ## | 243 | Sanger_isolates/93F.F.ab1 | Sanger_isolates | 93F.F.ab1   | 933                 |
| ## | 244 | Sanger_isolates/93R.R.ab1 | Sanger_isolates | 93R.R.ab1   | 1049                |
| ## | 245 | Sanger_isolates/94F.F.ab1 | Sanger_isolates | 94F.F.ab1   | 986                 |
| ## | 246 | Sanger_isolates/94R.R.ab1 | Sanger_isolates | 94R.R.ab1   | 802                 |
| ## | 247 | Sanger_isolates/95F.F.ab1 | Sanger_isolates | 95F.F.ab1   | 1050                |
| ## | 248 | Sanger_isolates/95R.R.ab1 | Sanger_isolates | 95R.R.ab1   | 911                 |
| ## | 249 | Sanger_isolates/96F.F.ab1 | Sanger_isolates | 96F.F.ab1   | 1167                |
| ## | 250 | Sanger_isolates/96R.R.ab1 | Sanger_isolates | 96R.R.ab1   | 1125                |
| ## | 251 | Sanger_isolates/97F.F.ab1 | Sanger_isolates | 97F.F.ab1   | 915                 |
| ## | 252 | Sanger_isolates/97R.R.ab1 | Sanger_isolates | 97R.R.ab1   | 993                 |
| ## | 253 | Sanger_isolates/98F.F.ab1 | Sanger_isolates | 98F.F.ab1   | 713                 |
| ## | 254 | Sanger_isolates/98R.R.ab1 | Sanger_isolates | 98R.R.ab1   | 716                 |
| ## | 255 | Sanger_isolates/99F.F.ab1 | Sanger_isolates | 99F.F.ab1   | 1178                |
| ## | 256 | Sanger_isolates/99R.R.ab1 | Sanger_isolates | 99R.R.ab1   | 1116                |
| ## |     | trimmed.length            | trim.start      | trim.finish | raw.secondary.peaks |
| ## | 1   | 314                       | 24              | 337         | 264                 |
| ## | 2   | 2                         | 484             | 485         | 237                 |
| ## | 3   | 610                       | 20              | 629         | 27                  |
| ## | 4   | 750                       | 21              | 770         | 8                   |
| ## | 5   | 573                       | 20              | 592         | 38                  |
| ## | 6   | 474                       | 73              | 546         | 20                  |
| ## | 7   | 625                       | 14              | 638         | 25                  |
| ## | 8   | 492                       | 14              | 505         | 12                  |
| ## | 9   | 557                       | 17              | 573         | 32                  |
| ## | 10  | 569                       | 26              | 594         | 29                  |
| ## | 11  | 624                       | 14              | 637         | 39                  |
| ## | 12  | 327                       | 5               | 331         | 74                  |
| ## | 13  | 589                       | 14              | 602         | 16                  |
| ## | 14  | 499                       | 6               | 504         | 7                   |
| ## | 15  | 624                       | 11              | 634         | 33                  |
| ## | 16  | 498                       | 5               | 502         | 32                  |
| ## | 17  | 609                       | 12              | 620         | 23                  |
| ## | 18  | 493                       | 13              | 505         | 26                  |
| ## | 19  | 604                       | 10              | 613         | 20                  |
| ## | 20  | 490                       | 15              | 504         | 42                  |
| ## | 21  | 610                       | 11              | 620         | 55                  |
| ## | 22  | 752                       | 16              | 767         | 24                  |
| ## | 23  | 621                       | 11              | 631         | 8                   |
| ## | 24  | 491                       | 15              | 505         | 19                  |
| ## | 25  | 319                       | 143             | 461         | 209                 |
| ## | 26  | 546                       | 39              | 584         | 238                 |

|       |     |     |     |     |
|-------|-----|-----|-----|-----|
| ## 27 | 363 | 11  | 373 | 58  |
| ## 28 | 730 | 17  | 746 | 38  |
| ## 29 | 356 | 17  | 372 | 55  |
| ## 30 | 730 | 19  | 748 | 29  |
| ## 31 | 344 | 23  | 366 | 26  |
| ## 32 | 310 | 14  | 323 | 16  |
| ## 33 | 408 | 85  | 492 | 265 |
| ## 34 | 825 | 19  | 843 | 23  |
| ## 35 | 0   | 0   | 0   | 145 |
| ## 36 | 0   | 0   | 0   | 136 |
| ## 37 | 0   | 0   | 0   | 147 |
| ## 38 | 754 | 16  | 769 | 25  |
| ## 39 | 0   | 0   | 0   | 223 |
| ## 40 | 1   | 341 | 341 | 243 |
| ## 41 | 168 | 22  | 189 | 177 |
| ## 42 | 0   | 0   | 0   | 99  |
| ## 43 | 214 | 16  | 229 | 201 |
| ## 44 | 832 | 21  | 852 | 14  |
| ## 45 | 566 | 17  | 582 | 19  |
| ## 46 | 594 | 15  | 608 | 24  |
| ## 47 | 237 | 192 | 428 | 204 |
| ## 48 | 463 | 18  | 480 | 35  |
| ## 49 | 231 | 34  | 264 | 56  |
| ## 50 | 122 | 17  | 138 | 23  |
| ## 51 | 355 | 120 | 474 | 81  |
| ## 52 | 462 | 40  | 501 | 86  |
| ## 53 | 343 | 37  | 379 | 31  |
| ## 54 | 457 | 54  | 510 | 150 |
| ## 55 | 365 | 11  | 375 | 55  |
| ## 56 | 204 | 17  | 220 | 38  |
| ## 57 | 498 | 25  | 522 | 40  |
| ## 58 | 307 | 14  | 320 | 42  |
| ## 59 | 560 | 20  | 579 | 116 |
| ## 60 | 829 | 18  | 846 | 39  |
| ## 61 | 594 | 23  | 616 | 47  |
| ## 62 | 729 | 19  | 747 | 28  |
| ## 63 | 354 | 22  | 375 | 57  |
| ## 64 | 204 | 18  | 221 | 43  |
| ## 65 | 72  | 83  | 154 | 174 |
| ## 66 | 797 | 19  | 815 | 16  |
| ## 67 | 353 | 22  | 374 | 54  |
| ## 68 | 730 | 15  | 744 | 22  |
| ## 69 | 225 | 277 | 501 | 264 |
| ## 70 | 38  | 10  | 47  | 232 |
| ## 71 | 559 | 23  | 581 | 17  |
| ## 72 | 707 | 18  | 724 | 26  |
| ## 73 | 423 | 17  | 439 | 6   |
| ## 74 | 753 | 17  | 769 | 23  |
| ## 75 | 256 | 13  | 268 | 271 |
| ## 76 | 770 | 19  | 788 | 14  |

|        |     |     |     |     |
|--------|-----|-----|-----|-----|
| ## 77  | 294 | 85  | 378 | 104 |
| ## 78  | 606 | 18  | 623 | 16  |
| ## 79  | 407 | 78  | 484 | 121 |
| ## 80  | 719 | 14  | 732 | 22  |
| ## 81  | 408 | 85  | 492 | 156 |
| ## 82  | 718 | 19  | 736 | 29  |
| ## 83  | 526 | 12  | 537 | 38  |
| ## 84  | 753 | 16  | 768 | 22  |
| ## 85  | 295 | 85  | 379 | 88  |
| ## 86  | 737 | 20  | 756 | 8   |
| ## 87  | 295 | 85  | 379 | 154 |
| ## 88  | 606 | 19  | 624 | 7   |
| ## 89  | 68  | 87  | 154 | 161 |
| ## 90  | 730 | 18  | 747 | 40  |
| ## 91  | 295 | 81  | 375 | 124 |
| ## 92  | 715 | 19  | 733 | 26  |
| ## 93  | 404 | 86  | 489 | 131 |
| ## 94  | 482 | 30  | 511 | 36  |
| ## 95  | 351 | 26  | 376 | 149 |
| ## 96  | 732 | 18  | 749 | 23  |
| ## 97  | 68  | 86  | 153 | 160 |
| ## 98  | 617 | 18  | 634 | 5   |
| ## 99  | 352 | 27  | 378 | 112 |
| ## 100 | 299 | 12  | 310 | 135 |
| ## 101 | 111 | 20  | 130 | 223 |
| ## 102 | 612 | 68  | 679 | 32  |
| ## 103 | 759 | 7   | 765 | 17  |
| ## 104 | 727 | 18  | 744 | 33  |
| ## 105 | 706 | 14  | 719 | 28  |
| ## 106 | 536 | 11  | 546 | 25  |
| ## 107 | 287 | 240 | 526 | 242 |
| ## 108 | 847 | 20  | 866 | 111 |
| ## 109 | 403 | 21  | 423 | 286 |
| ## 110 | 589 | 17  | 605 | 21  |
| ## 111 | 110 | 17  | 126 | 313 |
| ## 112 | 588 | 17  | 604 | 19  |
| ## 113 | 100 | 31  | 130 | 105 |
| ## 114 | 589 | 15  | 603 | 11  |
| ## 115 | 713 | 18  | 730 | 11  |
| ## 116 | 830 | 16  | 845 | 10  |
| ## 117 | 695 | 17  | 711 | 18  |
| ## 118 | 839 | 14  | 852 | 9   |
| ## 119 | 679 | 16  | 694 | 32  |
| ## 120 | 818 | 22  | 839 | 20  |
| ## 121 | 48  | 74  | 121 | 115 |
| ## 122 | 506 | 6   | 511 | 24  |
| ## 123 | 712 | 15  | 726 | 34  |
| ## 124 | 539 | 15  | 553 | 33  |
| ## 125 | 782 | 17  | 798 | 22  |
| ## 126 | 840 | 10  | 849 | 14  |

|        |     |     |     |     |
|--------|-----|-----|-----|-----|
| ## 127 | 712 | 18  | 729 | 41  |
| ## 128 | 890 | 11  | 900 | 15  |
| ## 129 | 678 | 21  | 698 | 16  |
| ## 130 | 788 | 8   | 795 | 43  |
| ## 131 | 623 | 12  | 634 | 49  |
| ## 132 | 499 | 8   | 506 | 9   |
| ## 133 | 534 | 18  | 551 | 12  |
| ## 134 | 693 | 14  | 706 | 13  |
| ## 135 | 708 | 18  | 725 | 34  |
| ## 136 | 689 | 18  | 706 | 7   |
| ## 137 | 345 | 325 | 669 | 461 |
| ## 138 | 830 | 15  | 844 | 22  |
| ## 139 | 703 | 6   | 708 | 47  |
| ## 140 | 319 | 10  | 328 | 267 |
| ## 141 | 4   | 388 | 391 | 438 |
| ## 142 | 690 | 17  | 706 | 28  |
| ## 143 | 629 | 11  | 639 | 77  |
| ## 144 | 516 | 15  | 530 | 25  |
| ## 145 | 592 | 18  | 609 | 31  |
| ## 146 | 1   | 368 | 368 | 243 |
| ## 147 | 713 | 8   | 720 | 9   |
| ## 148 | 687 | 20  | 706 | 32  |
| ## 149 | 705 | 15  | 719 | 22  |
| ## 150 | 922 | 18  | 939 | 13  |
| ## 151 | 0   | 0   | 0   | 331 |
| ## 152 | 440 | 13  | 452 | 118 |
| ## 153 | 1   | 603 | 603 | 431 |
| ## 154 | 28  | 14  | 41  | 361 |
| ## 155 | 0   | 0   | 0   | 380 |
| ## 156 | 0   | 0   | 0   | 416 |
| ## 157 | 718 | 15  | 732 | 13  |
| ## 158 | 963 | 17  | 979 | 21  |
| ## 159 | 75  | 20  | 94  | 411 |
| ## 160 | 465 | 11  | 475 | 48  |
| ## 161 | 561 | 74  | 634 | 107 |
| ## 162 | 748 | 19  | 766 | 30  |
| ## 163 | 697 | 14  | 710 | 24  |
| ## 164 | 610 | 13  | 622 | 5   |
| ## 165 | 539 | 39  | 577 | 48  |
| ## 166 | 349 | 15  | 363 | 31  |
| ## 167 | 245 | 34  | 278 | 262 |
| ## 168 | 619 | 17  | 635 | 14  |
| ## 169 | 588 | 7   | 594 | 44  |
| ## 170 | 738 | 1   | 738 | 24  |
| ## 171 | 615 | 14  | 628 | 83  |
| ## 172 | 716 | 11  | 726 | 14  |
| ## 173 | 621 | 19  | 639 | 25  |
| ## 174 | 582 | 21  | 602 | 30  |
| ## 175 | 642 | 25  | 666 | 24  |
| ## 176 | 831 | 9   | 839 | 33  |



|        |     |    |     |     |
|--------|-----|----|-----|-----|
| ## 177 | 586 | 11 | 596 | 24  |
| ## 178 | 616 | 9  | 624 | 7   |
| ## 179 | 360 | 99 | 458 | 126 |
| ## 180 | 761 | 23 | 783 | 35  |
| ## 181 | 560 | 21 | 580 | 29  |
| ## 182 | 763 | 10 | 772 | 19  |
| ## 183 | 512 | 16 | 527 | 33  |
| ## 184 | 643 | 19 | 661 | 24  |
| ## 185 | 633 | 21 | 653 | 25  |
| ## 186 | 727 | 16 | 742 | 4   |
| ## 187 | 519 | 10 | 528 | 63  |
| ## 188 | 411 | 17 | 427 | 20  |
| ## 189 | 342 | 15 | 356 | 31  |
| ## 190 | 72  | 15 | 86  | 207 |
| ## 191 | 645 | 10 | 654 | 29  |
| ## 192 | 783 | 18 | 800 | 11  |
| ## 193 | 713 | 14 | 726 | 71  |
| ## 194 | 747 | 17 | 763 | 12  |
| ## 195 | 629 | 11 | 639 | 44  |
| ## 196 | 586 | 14 | 599 | 54  |
| ## 197 | 641 | 15 | 655 | 17  |
| ## 198 | 828 | 14 | 841 | 22  |
| ## 199 | 499 | 23 | 521 | 56  |
| ## 200 | 740 | 15 | 754 | 14  |
| ## 201 | 585 | 16 | 600 | 39  |
| ## 202 | 317 | 34 | 350 | 199 |
| ## 203 | 550 | 17 | 566 | 31  |
| ## 204 | 700 | 30 | 729 | 29  |
| ## 205 | 547 | 20 | 566 | 28  |
| ## 206 | 314 | 13 | 326 | 33  |
| ## 207 | 524 | 14 | 537 | 57  |
| ## 208 | 0   | 0  | 0   | 129 |
| ## 209 | 706 | 9  | 714 | 11  |
| ## 210 | 839 | 14 | 852 | 14  |
| ## 211 | 215 | 46 | 260 | 367 |
| ## 212 | 636 | 33 | 668 | 268 |
| ## 213 | 633 | 14 | 646 | 30  |
| ## 214 | 716 | 28 | 743 | 12  |
| ## 215 | 225 | 15 | 239 | 107 |
| ## 216 | 751 | 23 | 773 | 12  |
| ## 217 | 441 | 76 | 516 | 114 |
| ## 218 | 275 | 26 | 300 | 47  |
| ## 219 | 567 | 7  | 573 | 64  |
| ## 220 | 796 | 21 | 816 | 17  |
| ## 221 | 556 | 10 | 565 | 28  |
| ## 222 | 710 | 17 | 726 | 15  |
| ## 223 | 594 | 21 | 614 | 12  |
| ## 224 | 709 | 33 | 741 | 25  |
| ## 225 | 501 | 14 | 514 | 0   |
| ## 226 | 769 | 24 | 792 | 30  |

|        |                         |                  |                      |          |
|--------|-------------------------|------------------|----------------------|----------|
| ## 227 | 291                     | 10               | 300                  | 27       |
| ## 228 | 729                     | 17               | 745                  | 12       |
| ## 229 | 277                     | 22               | 298                  | 4        |
| ## 230 | 819                     | 21               | 839                  | 26       |
| ## 231 | 474                     | 25               | 498                  | 41       |
| ## 232 | 713                     | 17               | 729                  | 9        |
| ## 233 | 617                     | 8                | 624                  | 67       |
| ## 234 | 655                     | 19               | 673                  | 42       |
| ## 235 | 40                      | 139              | 178                  | 220      |
| ## 236 | 30                      | 30               | 59                   | 340      |
| ## 237 | 283                     | 58               | 340                  | 105      |
| ## 238 | 901                     | 19               | 919                  | 13       |
| ## 239 | 709                     | 9                | 717                  | 24       |
| ## 240 | 654                     | 18               | 671                  | 16       |
| ## 241 | 614                     | 16               | 629                  | 13       |
| ## 242 | 911                     | 10               | 920                  | 10       |
| ## 243 | 705                     | 17               | 721                  | 12       |
| ## 244 | 706                     | 15               | 720                  | 10       |
| ## 245 | 199                     | 76               | 274                  | 280      |
| ## 246 | 581                     | 23               | 603                  | 33       |
| ## 247 | 81                      | 70               | 150                  | 205      |
| ## 248 | 198                     | 29               | 226                  | 33       |
| ## 249 | 610                     | 14               | 623                  | 46       |
| ## 250 | 723                     | 20               | 742                  | 13       |
| ## 251 | 476                     | 217              | 692                  | 126      |
| ## 252 | 85                      | 55               | 139                  | 204      |
| ## 253 | 534                     | 15               | 548                  | 38       |
| ## 254 | 595                     | 19               | 613                  | 3        |
| ## 255 | 680                     | 17               | 696                  | 28       |
| ## 256 | 909                     | 17               | 925                  | 14       |
| ##     | trimmed.secondary.peaks | raw.mean.quality | trimmed.mean.quality |          |
| ## 1   |                         | 68               | 23.52626             | 28.95860 |
| ## 2   |                         | 1                | 17.29835             | 41.00000 |
| ## 3   |                         | 2                | 45.56604             | 51.27049 |
| ## 4   |                         | 0                | 47.80229             | 52.50400 |
| ## 5   |                         | 5                | 38.44748             | 45.30890 |
| ## 6   |                         | 1                | 41.82790             | 50.24684 |
| ## 7   |                         | 0                | 44.18926             | 52.12320 |
| ## 8   |                         | 1                | 46.71632             | 52.29472 |
| ## 9   |                         | 6                | 42.88615             | 50.83124 |
| ## 10  |                         | 1                | 42.21843             | 48.74868 |
| ## 11  |                         | 0                | 43.04356             | 51.55609 |
| ## 12  |                         | 8                | 44.62283             | 53.20489 |
| ## 13  |                         | 0                | 45.51059             | 51.64686 |
| ## 14  |                         | 3                | 46.27200             | 51.16836 |
| ## 15  |                         | 0                | 42.58244             | 51.13141 |
| ## 16  |                         | 4                | 43.72024             | 51.44309 |
| ## 17  |                         | 0                | 44.96687             | 51.40558 |
| ## 18  |                         | 1                | 45.29670             | 52.06288 |
| ## 19  |                         | 0                | 43.70712             | 51.82616 |

|       |     |          |          |
|-------|-----|----------|----------|
| ## 20 | 3   | 44.36121 | 51.89796 |
| ## 21 | 1   | 41.73789 | 51.63607 |
| ## 22 | 0   | 46.10872 | 52.54122 |
| ## 23 | 1   | 46.69818 | 51.25282 |
| ## 24 | 4   | 44.35714 | 49.69654 |
| ## 25 | 122 | 19.52190 | 20.86834 |
| ## 26 | 202 | 21.88141 | 22.33516 |
| ## 27 | 2   | 41.69990 | 50.81267 |
| ## 28 | 4   | 45.30661 | 51.90548 |
| ## 29 | 2   | 44.29032 | 50.97472 |
| ## 30 | 5   | 44.81320 | 51.05342 |
| ## 31 | 1   | 42.53370 | 48.79651 |
| ## 32 | 0   | 47.19084 | 57.95161 |
| ## 33 | 65  | 25.31256 | 33.45588 |
| ## 34 | 0   | 46.69182 | 52.10182 |
| ## 35 | 0   | 11.50000 | NA       |
| ## 36 | 0   | 9.68500  | NA       |
| ## 37 | 0   | 9.54000  | NA       |
| ## 38 | 0   | 46.45817 | 51.85942 |
| ## 39 | 0   | 13.90941 | NA       |
| ## 40 | 0   | 16.65982 | 51.00000 |
| ## 41 | 0   | 33.66131 | 48.80952 |
| ## 42 | 0   | 13.94574 | NA       |
| ## 43 | 29  | 26.37595 | 35.11682 |
| ## 44 | 0   | 47.07706 | 52.07332 |
| ## 45 | 1   | 50.60893 | 56.80212 |
| ## 46 | 0   | 47.13833 | 50.88047 |
| ## 47 | 41  | 26.01257 | 33.25738 |
| ## 48 | 11  | 44.81257 | 49.79482 |
| ## 49 | 20  | 40.38725 | 44.09957 |
| ## 50 | 5   | 40.43455 | 39.86885 |
| ## 51 | 21  | 36.43493 | 43.17465 |
| ## 52 | 12  | 39.42961 | 47.54762 |
| ## 53 | 6   | 39.91544 | 44.66181 |
| ## 54 | 69  | 35.06421 | 39.51204 |
| ## 55 | 0   | 40.40994 | 51.49041 |
| ## 56 | 1   | 43.90269 | 50.26961 |
| ## 57 | 2   | 42.61054 | 48.40161 |
| ## 58 | 0   | 41.78200 | 50.64169 |
| ## 59 | 0   | 37.81471 | 51.78393 |
| ## 60 | 9   | 45.50294 | 50.45838 |
| ## 61 | 1   | 40.44714 | 48.74242 |
| ## 62 | 3   | 44.63526 | 51.66255 |
| ## 63 | 1   | 42.36053 | 50.97740 |
| ## 64 | 0   | 42.45929 | 50.63725 |
| ## 65 | 11  | 28.17019 | 35.50000 |
| ## 66 | 0   | 46.61232 | 51.95107 |
| ## 67 | 3   | 42.39801 | 50.27479 |
| ## 68 | 5   | 45.96314 | 51.26849 |
| ## 69 | 63  | 19.39213 | 23.85778 |

|        |    |          |          |
|--------|----|----------|----------|
| ## 70  | 9  | 14.86667 | 23.94737 |
| ## 71  | 1  | 45.83409 | 49.19857 |
| ## 72  | 3  | 43.60435 | 51.69731 |
| ## 73  | 1  | 45.42436 | 48.10875 |
| ## 74  | 1  | 47.12354 | 51.25365 |
| ## 75  | 84 | 26.38418 | 27.64062 |
| ## 76  | 1  | 47.26456 | 52.04545 |
| ## 77  | 47 | 30.14821 | 32.12585 |
| ## 78  | 0  | 47.72393 | 51.65842 |
| ## 79  | 64 | 30.43121 | 33.80344 |
| ## 80  | 0  | 46.96162 | 51.80807 |
| ## 81  | 66 | 29.17797 | 33.41176 |
| ## 82  | 0  | 44.49638 | 53.04735 |
| ## 83  | 1  | 43.10359 | 48.40684 |
| ## 84  | 3  | 44.52515 | 51.00398 |
| ## 85  | 41 | 31.71031 | 34.21695 |
| ## 86  | 0  | 47.69884 | 52.05020 |
| ## 87  | 49 | 29.23843 | 33.68136 |
| ## 88  | 0  | 46.78559 | 52.96205 |
| ## 89  | 11 | 29.88686 | 34.75000 |
| ## 90  | 0  | 45.77387 | 52.00548 |
| ## 91  | 44 | 30.51278 | 33.48136 |
| ## 92  | 0  | 45.26036 | 52.20839 |
| ## 93  | 10 | 39.76145 | 53.92079 |
| ## 94  | 7  | 45.59307 | 50.04357 |
| ## 95  | 61 | 30.09487 | 32.08547 |
| ## 96  | 0  | 44.83675 | 52.36885 |
| ## 97  | 14 | 29.22585 | 34.32353 |
| ## 98  | 0  | 47.66243 | 52.77958 |
| ## 99  | 54 | 31.28186 | 31.79830 |
| ## 100 | 3  | 38.86575 | 52.85284 |
| ## 101 | 3  | 26.53713 | 47.02703 |
| ## 102 | 9  | 43.79380 | 48.55229 |
| ## 103 | 0  | 45.57021 | 51.87352 |
| ## 104 | 1  | 45.90696 | 52.61073 |
| ## 105 | 2  | 46.25922 | 51.52691 |
| ## 106 | 2  | 49.07506 | 57.05784 |
| ## 107 | 64 | 26.86437 | 30.41812 |
| ## 108 | 22 | 39.32750 | 48.58796 |
| ## 109 | 93 | 23.98364 | 30.43921 |
| ## 110 | 1  | 46.42845 | 52.27844 |
| ## 111 | 31 | 26.95376 | 32.40909 |
| ## 112 | 1  | 45.30882 | 51.76531 |
| ## 113 | 19 | 31.10756 | 33.68000 |
| ## 114 | 3  | 48.83965 | 52.37012 |
| ## 115 | 0  | 46.89791 | 52.07293 |
| ## 116 | 2  | 46.71604 | 51.49157 |
| ## 117 | 7  | 45.79581 | 51.01007 |
| ## 118 | 5  | 49.07415 | 50.99046 |
| ## 119 | 4  | 44.54502 | 50.10457 |

|        |     |          |          |
|--------|-----|----------|----------|
| ## 120 | 2   | 46.13967 | 50.09169 |
| ## 121 | 3   | 37.86280 | 50.04167 |
| ## 122 | 12  | 44.37313 | 48.00988 |
| ## 123 | 3   | 44.11610 | 50.15730 |
| ## 124 | 3   | 49.96474 | 56.99629 |
| ## 125 | 3   | 47.09756 | 51.26854 |
| ## 126 | 1   | 46.81638 | 51.57976 |
| ## 127 | 0   | 44.17473 | 52.06882 |
| ## 128 | 2   | 46.29256 | 51.57191 |
| ## 129 | 0   | 45.55676 | 51.15782 |
| ## 130 | 1   | 43.72099 | 50.80584 |
| ## 131 | 0   | 42.37877 | 51.09952 |
| ## 132 | 0   | 45.78534 | 51.83768 |
| ## 133 | 0   | 45.72338 | 51.79213 |
| ## 134 | 0   | 47.28150 | 52.48052 |
| ## 135 | 0   | 44.07912 | 51.60311 |
| ## 136 | 0   | 48.79946 | 53.03048 |
| ## 137 | 243 | 13.87130 | 13.66087 |
| ## 138 | 1   | 45.91261 | 52.04699 |
| ## 139 | 0   | 43.39892 | 50.79232 |
| ## 140 | 100 | 27.14393 | 29.44201 |
| ## 141 | 4   | 13.86864 | 32.25000 |
| ## 142 | 1   | 46.50494 | 51.06957 |
| ## 143 | 53  | 34.43218 | 37.30366 |
| ## 144 | 4   | 42.84799 | 51.32558 |
| ## 145 | 2   | 44.51629 | 52.33277 |
| ## 146 | 1   | 14.18699 | 45.00000 |
| ## 147 | 2   | 46.45987 | 51.45302 |
| ## 148 | 3   | 46.46591 | 51.60408 |
| ## 149 | 1   | 45.02753 | 51.66099 |
| ## 150 | 3   | 47.18482 | 51.46095 |
| ## 151 | 0   | 13.25934 | NA       |
| ## 152 | 23  | 38.89889 | 48.61364 |
| ## 153 | 0   | 14.32338 | 42.00000 |
| ## 154 | 0   | 15.65925 | 46.64286 |
| ## 155 | 0   | 12.86242 | NA       |
| ## 156 | 0   | 12.37633 | NA       |
| ## 157 | 1   | 45.42989 | 52.26741 |
| ## 158 | 2   | 46.64190 | 52.01454 |
| ## 159 | 2   | 17.59757 | 39.37333 |
| ## 160 | 20  | 43.77935 | 46.73763 |
| ## 161 | 28  | 33.30795 | 39.86631 |
| ## 162 | 6   | 45.12286 | 49.24465 |
| ## 163 | 0   | 43.64877 | 52.24821 |
| ## 164 | 0   | 51.26779 | 57.74098 |
| ## 165 | 5   | 41.28306 | 48.91651 |
| ## 166 | 5   | 47.21540 | 51.14900 |
| ## 167 | 77  | 26.96061 | 30.80408 |
| ## 168 | 3   | 45.81703 | 50.77544 |
| ## 169 | 0   | 42.57407 | 52.03741 |

|        |     |          |          |
|--------|-----|----------|----------|
| ## 170 | 0   | 44.61325 | 52.06967 |
| ## 171 | 3   | 40.12092 | 50.23902 |
| ## 172 | 3   | 47.72076 | 51.59916 |
| ## 173 | 1   | 44.13673 | 52.07729 |
| ## 174 | 2   | 45.81655 | 51.86770 |
| ## 175 | 1   | 45.08815 | 52.33645 |
| ## 176 | 1   | 43.88818 | 52.10469 |
| ## 177 | 0   | 44.15400 | 51.71843 |
| ## 178 | 0   | 47.25962 | 50.52922 |
| ## 179 | 51  | 32.44124 | 35.23889 |
| ## 180 | 6   | 44.07605 | 50.28252 |
| ## 181 | 1   | 45.26030 | 51.95179 |
| ## 182 | 0   | 45.71769 | 52.24771 |
| ## 183 | 0   | 41.94208 | 48.58203 |
| ## 184 | 1   | 43.80748 | 49.44946 |
| ## 185 | 0   | 45.64942 | 52.08057 |
| ## 186 | 0   | 47.88824 | 52.20083 |
| ## 187 | 3   | 45.16516 | 52.90366 |
| ## 188 | 4   | 45.52700 | 50.73966 |
| ## 189 | 0   | 42.61411 | 48.48538 |
| ## 190 | 0   | 23.30952 | 45.31944 |
| ## 191 | 0   | 46.01811 | 52.24031 |
| ## 192 | 0   | 47.42912 | 52.64112 |
| ## 193 | 1   | 40.15228 | 50.86816 |
| ## 194 | 0   | 47.17663 | 52.30254 |
| ## 195 | 2   | 42.96177 | 49.65978 |
| ## 196 | 2   | 45.09729 | 55.10922 |
| ## 197 | 1   | 45.53771 | 52.27769 |
| ## 198 | 2   | 45.97950 | 52.40580 |
| ## 199 | 2   | 43.78778 | 54.23246 |
| ## 200 | 0   | 46.84308 | 51.78784 |
| ## 201 | 0   | 43.03297 | 51.89744 |
| ## 202 | 30  | 25.50342 | 29.71609 |
| ## 203 | 15  | 41.75907 | 44.21818 |
| ## 204 | 9   | 41.05775 | 46.70000 |
| ## 205 | 1   | 43.88977 | 49.17733 |
| ## 206 | 1   | 42.77949 | 51.51592 |
| ## 207 | 0   | 39.53012 | 49.66985 |
| ## 208 | 0   | 9.80500  | NA       |
| ## 209 | 0   | 44.99567 | 52.06516 |
| ## 210 | 2   | 43.39237 | 50.66031 |
| ## 211 | 68  | 20.19143 | 23.00465 |
| ## 212 | 195 | 25.31847 | 25.66195 |
| ## 213 | 4   | 48.50936 | 55.63507 |
| ## 214 | 1   | 46.05228 | 51.41480 |
| ## 215 | 2   | 40.14205 | 47.48889 |
| ## 216 | 2   | 48.06082 | 51.01731 |
| ## 217 | 72  | 32.29844 | 35.15873 |
| ## 218 | 4   | 41.25222 | 47.86909 |
| ## 219 | 1   | 48.68897 | 58.84656 |

|        |                 |                     |          |
|--------|-----------------|---------------------|----------|
| ## 220 | 2               | 48.70281            | 52.08794 |
| ## 221 | 3               | 49.28101            | 57.92086 |
| ## 222 | 0               | 48.26678            | 53.06479 |
| ## 223 | 5               | 45.04702            | 46.95286 |
| ## 224 | 11              | 45.16576            | 47.93794 |
| ## 225 | 0               | 51.21470            | 52.21557 |
| ## 226 | 4               | 44.86447            | 49.32900 |
| ## 227 | 2               | 45.89184            | 51.19931 |
| ## 228 | 2               | 48.61860            | 52.56927 |
| ## 229 | 1               | 48.41942            | 51.59567 |
| ## 230 | 1               | 47.16937            | 52.70574 |
| ## 231 | 0               | 42.68714            | 51.18987 |
| ## 232 | 0               | 47.34732            | 49.84853 |
| ## 233 | 13              | 42.83585            | 50.72123 |
| ## 234 | 0               | 45.38929            | 51.47939 |
| ## 235 | 4               | 23.82194            | 38.97500 |
| ## 236 | 0               | 20.64130            | 50.10000 |
| ## 237 | 26              | 34.88655            | 41.56184 |
| ## 238 | 1               | 46.73662            | 51.73030 |
| ## 239 | 0               | 46.37755            | 51.01693 |
| ## 240 | 0               | 47.77907            | 53.06269 |
| ## 241 | 0               | 48.38153            | 52.37296 |
| ## 242 | 0               | 48.85915            | 52.58836 |
| ## 243 | 0               | 47.27079            | 50.78440 |
| ## 244 | 3               | 48.34414            | 51.65864 |
| ## 245 | 71              | 28.73834            | 34.01005 |
| ## 246 | 13              | 42.83602            | 45.78657 |
| ## 247 | 2               | 29.74430            | 45.71605 |
| ## 248 | 3               | 41.85137            | 46.61111 |
| ## 249 | 2               | 40.89957            | 49.95738 |
| ## 250 | 4               | 46.03530            | 51.77593 |
| ## 251 | 54              | 33.62568            | 37.63445 |
| ## 252 | 14              | 28.39196            | 32.38824 |
| ## 253 | 1               | 43.49930            | 51.18539 |
| ## 254 | 0               | 50.22981            | 52.82689 |
| ## 255 | 4               | 44.20185            | 51.02059 |
| ## 256 | 2               | 46.10993            | 51.00880 |
| ##     | raw.min.quality | trimmed.min.quality |          |
| ## 1   | 2               | 8                   |          |
| ## 2   | 2               | 41                  |          |
| ## 3   | 2               | 15                  |          |
| ## 4   | 2               | 10                  |          |
| ## 5   | 2               | 2                   |          |
| ## 6   | 2               | 23                  |          |
| ## 7   | 2               | 7                   |          |
| ## 8   | 2               | 7                   |          |
| ## 9   | 2               | 7                   |          |
| ## 10  | 2               | 2                   |          |
| ## 11  | 2               | 7                   |          |
| ## 12  | 2               | 7                   |          |

|       |   |    |
|-------|---|----|
| ## 13 | 2 | 7  |
| ## 14 | 2 | 9  |
| ## 15 | 2 | 7  |
| ## 16 | 2 | 10 |
| ## 17 | 2 | 7  |
| ## 18 | 2 | 15 |
| ## 19 | 2 | 7  |
| ## 20 | 2 | 10 |
| ## 21 | 2 | 10 |
| ## 22 | 2 | 2  |
| ## 23 | 7 | 7  |
| ## 24 | 2 | 6  |
| ## 25 | 2 | 7  |
| ## 26 | 2 | 2  |
| ## 27 | 4 | 12 |
| ## 28 | 3 | 3  |
| ## 29 | 2 | 9  |
| ## 30 | 4 | 8  |
| ## 31 | 4 | 16 |
| ## 32 | 5 | 9  |
| ## 33 | 2 | 10 |
| ## 34 | 3 | 9  |
| ## 35 | 4 | NA |
| ## 36 | 3 | NA |
| ## 37 | 3 | NA |
| ## 38 | 5 | 14 |
| ## 39 | 5 | NA |
| ## 40 | 6 | 51 |
| ## 41 | 5 | 20 |
| ## 42 | 5 | NA |
| ## 43 | 2 | 7  |
| ## 44 | 2 | 22 |
| ## 45 | 5 | 5  |
| ## 46 | 7 | 22 |
| ## 47 | 2 | 8  |
| ## 48 | 5 | 7  |
| ## 49 | 5 | 5  |
| ## 50 | 5 | 8  |
| ## 51 | 2 | 7  |
| ## 52 | 2 | 6  |
| ## 53 | 4 | 12 |
| ## 54 | 4 | 4  |
| ## 55 | 2 | 12 |
| ## 56 | 3 | 6  |
| ## 57 | 5 | 15 |
| ## 58 | 5 | 7  |
| ## 59 | 5 | 20 |
| ## 60 | 3 | 10 |
| ## 61 | 4 | 15 |
| ## 62 | 5 | 14 |



|        |   |    |
|--------|---|----|
| ## 63  | 5 | 20 |
| ## 64  | 5 | 6  |
| ## 65  | 2 | 12 |
| ## 66  | 5 | 9  |
| ## 67  | 4 | 9  |
| ## 68  | 5 | 8  |
| ## 69  | 2 | 5  |
| ## 70  | 5 | 9  |
| ## 71  | 4 | 14 |
| ## 72  | 5 | 14 |
| ## 73  | 5 | 8  |
| ## 74  | 5 | 14 |
| ## 75  | 4 | 8  |
| ## 76  | 5 | 9  |
| ## 77  | 2 | 8  |
| ## 78  | 5 | 9  |
| ## 79  | 5 | 10 |
| ## 80  | 3 | 9  |
| ## 81  | 2 | 10 |
| ## 82  | 2 | 9  |
| ## 83  | 3 | 20 |
| ## 84  | 2 | 14 |
| ## 85  | 2 | 10 |
| ## 86  | 4 | 8  |
| ## 87  | 5 | 12 |
| ## 88  | 4 | 8  |
| ## 89  | 6 | 12 |
| ## 90  | 4 | 8  |
| ## 91  | 2 | 10 |
| ## 92  | 4 | 7  |
| ## 93  | 2 | 31 |
| ## 94  | 2 | 7  |
| ## 95  | 2 | 7  |
| ## 96  | 2 | 8  |
| ## 97  | 6 | 12 |
| ## 98  | 2 | 14 |
| ## 99  | 3 | 7  |
| ## 100 | 5 | 9  |
| ## 101 | 6 | 14 |
| ## 102 | 5 | 12 |
| ## 103 | 5 | 8  |
| ## 104 | 5 | 12 |
| ## 105 | 5 | 5  |
| ## 106 | 5 | 5  |
| ## 107 | 2 | 8  |
| ## 108 | 5 | 8  |
| ## 109 | 2 | 7  |
| ## 110 | 5 | 10 |
| ## 111 | 5 | 10 |
| ## 112 | 2 | 14 |

|        |   |    |
|--------|---|----|
| ## 113 | 5 | 10 |
| ## 114 | 5 | 8  |
| ## 115 | 4 | 11 |
| ## 116 | 2 | 2  |
| ## 117 | 5 | 5  |
| ## 118 | 4 | 4  |
| ## 119 | 3 | 5  |
| ## 120 | 5 | 5  |
| ## 121 | 2 | 24 |
| ## 122 | 2 | 8  |
| ## 123 | 2 | 4  |
| ## 124 | 5 | 8  |
| ## 125 | 5 | 6  |
| ## 126 | 5 | 9  |
| ## 127 | 5 | 20 |
| ## 128 | 2 | 18 |
| ## 129 | 2 | 2  |
| ## 130 | 5 | 5  |
| ## 131 | 5 | 20 |
| ## 132 | 2 | 5  |
| ## 133 | 6 | 11 |
| ## 134 | 4 | 9  |
| ## 135 | 5 | 14 |
| ## 136 | 5 | 9  |
| ## 137 | 5 | 5  |
| ## 138 | 3 | 10 |
| ## 139 | 5 | 5  |
| ## 140 | 4 | 10 |
| ## 141 | 5 | 19 |
| ## 142 | 2 | 12 |
| ## 143 | 2 | 7  |
| ## 144 | 2 | 7  |
| ## 145 | 6 | 20 |
| ## 146 | 5 | 45 |
| ## 147 | 6 | 8  |
| ## 148 | 5 | 5  |
| ## 149 | 4 | 9  |
| ## 150 | 4 | 4  |
| ## 151 | 5 | NA |
| ## 152 | 5 | 8  |
| ## 153 | 5 | 42 |
| ## 154 | 5 | 15 |
| ## 155 | 5 | NA |
| ## 156 | 5 | NA |
| ## 157 | 5 | 8  |
| ## 158 | 5 | 8  |
| ## 159 | 2 | 8  |
| ## 160 | 2 | 6  |
| ## 161 | 2 | 10 |
| ## 162 | 2 | 2  |

|        |   |    |
|--------|---|----|
| ## 163 | 2 | 20 |
| ## 164 | 2 | 12 |
| ## 165 | 2 | 7  |
| ## 166 | 2 | 2  |
| ## 167 | 2 | 8  |
| ## 168 | 2 | 6  |
| ## 169 | 2 | 7  |
| ## 170 | 2 | 10 |
| ## 171 | 2 | 12 |
| ## 172 | 2 | 8  |
| ## 173 | 2 | 20 |
| ## 174 | 2 | 8  |
| ## 175 | 2 | 10 |
| ## 176 | 2 | 2  |
| ## 177 | 2 | 15 |
| ## 178 | 2 | 2  |
| ## 179 | 2 | 10 |
| ## 180 | 2 | 7  |
| ## 181 | 2 | 20 |
| ## 182 | 2 | 2  |
| ## 183 | 2 | 14 |
| ## 184 | 2 | 6  |
| ## 185 | 2 | 20 |
| ## 186 | 2 | 2  |
| ## 187 | 2 | 9  |
| ## 188 | 2 | 2  |
| ## 189 | 2 | 7  |
| ## 190 | 5 | 10 |
| ## 191 | 2 | 7  |
| ## 192 | 2 | 14 |
| ## 193 | 2 | 20 |
| ## 194 | 2 | 20 |
| ## 195 | 2 | 6  |
| ## 196 | 2 | 2  |
| ## 197 | 2 | 14 |
| ## 198 | 2 | 8  |
| ## 199 | 2 | 6  |
| ## 200 | 2 | 6  |
| ## 201 | 2 | 14 |
| ## 202 | 2 | 2  |
| ## 203 | 2 | 8  |
| ## 204 | 2 | 9  |
| ## 205 | 6 | 15 |
| ## 206 | 6 | 6  |
| ## 207 | 2 | 20 |
| ## 208 | 3 | NA |
| ## 209 | 2 | 9  |
| ## 210 | 2 | 2  |
| ## 211 | 2 | 7  |
| ## 212 | 2 | 8  |

|        |   |    |
|--------|---|----|
| ## 213 | 2 | 2  |
| ## 214 | 2 | 7  |
| ## 215 | 2 | 2  |
| ## 216 | 2 | 2  |
| ## 217 | 6 | 8  |
| ## 218 | 2 | 7  |
| ## 219 | 2 | 13 |
| ## 220 | 2 | 10 |
| ## 221 | 2 | 14 |
| ## 222 | 2 | 12 |
| ## 223 | 6 | 7  |
| ## 224 | 2 | 14 |
| ## 225 | 2 | 15 |
| ## 226 | 2 | 8  |
| ## 227 | 2 | 14 |
| ## 228 | 2 | 12 |
| ## 229 | 7 | 12 |
| ## 230 | 2 | 9  |
| ## 231 | 2 | 20 |
| ## 232 | 2 | 15 |
| ## 233 | 2 | 7  |
| ## 234 | 2 | 22 |
| ## 235 | 2 | 14 |
| ## 236 | 2 | 40 |
| ## 237 | 2 | 10 |
| ## 238 | 2 | 2  |
| ## 239 | 2 | 14 |
| ## 240 | 2 | 7  |
| ## 241 | 2 | 15 |
| ## 242 | 2 | 13 |
| ## 243 | 2 | 14 |
| ## 244 | 2 | 7  |
| ## 245 | 2 | 13 |
| ## 246 | 6 | 10 |
| ## 247 | 2 | 21 |
| ## 248 | 2 | 2  |
| ## 249 | 2 | 2  |
| ## 250 | 2 | 6  |
| ## 251 | 2 | 10 |
| ## 252 | 2 | 2  |
| ## 253 | 2 | 15 |
| ## 254 | 2 | 8  |
| ## 255 | 2 | 7  |
| ## 256 | 2 | 2  |

```

p<- ggplot(sf$summaries, aes(x = folder.name, y = raw.mean.quality)) + geom_boxplot()
p <- ggplot(sf$summaries, aes(x = folder.name, y = trimmed.mean.quality)) + geom_boxplot()
p <- ggplot(sf$summaries, aes(x = folder.name, y = trimmed.secondary.peaks))

```

```

+ geom_boxplot() + geom_hline(yintercept = 2, linetype = 3, colour = 'red')
p <- ggplot(sf$summaries, aes(x = trimmed.mean.quality, y = trimmed.secondary
.peaks)) + geom_point()

# Make consensus by merging reads
fwd = readsangerseq("Sanger_isolates/13F.F.ab1")
rev = readsangerseq("Sanger_isolates/13R.R.ab1")
fwd = primarySeq(fwd)
rev = primarySeq(rev)
rev = reverseComplement(rev)
reads = DNASTringSet(c(as.character(fwd), as.character(rev)))
names(reads) = c('fwd', 'rev')
merged.reads = merge.reads(reads)

## [1] "Aligning reads"
## [1] "Calling consensus sequence"
## [1] "Calculating differences between reads and consensus"

names(merged.reads)

## [1] "consensus"           "alignment"
## [3] "differences"          "distance.matrix"
## [5] "dendrogram"          "indels"
## [7] "stop.codons"         "secondary.peak.columns"

merged.reads

## $consensus
## 1283-letter "DNASTring" instance
## seq: GATGCAATCTACAGATTCTGCATACAGGCTACTA...TCGCCTACATGAAGTNCGGAATCGCTAGTAAT
C
##
## $alignment
## A DNASTringSet instance of length 3
##   width seq                                     names
## [1] 1283 GATGCAATCTACAGATTCTGC...----- fwd
## [2] 1283 -----...GTNCGGAATCGCTAGTAATC rev
## [3] 1283 GATGCAATCTACAGATTCTGC...GTNCGGAATCGCTAGTAATC consensus
##
## $differences
##   name pairwise.diffs.to.consensus unused.chars
## 1 fwd                60                0
## 2 rev                67                0
##
## $distance.matrix
##           fwd      rev
## fwd 0.0000000 0.2491807
## rev 0.2491807 0.0000000
## attr(,"correction")
## [1] "Jukes-Cantor"
##

```

```

## $dendrogram
## 'dendrogram' with 2 branches and 2 members total, at height 0.1245903
##
## $indels
## NULL
##
## $stop.codons
## NULL
##
## $secondary.peak.columns
## NULL
##
## attr(,"class")
## [1] "merged.read"

merged.reads$consensus

## 1283-letter "DNASTring" instance
## seq: GATGCAATCTACAGATTCTGCATACAGGCTACTA...TCGCCTACATGAAGTNCGGAATCGCTAGTAAT
C

BrowseSeqs(merged.reads$alignment)
merged.reads$secondary.peak.columns

## NULL

merged.reads$differences

## name pairwise.diffs.to.consensus unused.chars
## 1 fwd 60 0
## 2 rev 67 0

write.dna(merged.reads, file="Sanger_isolates/13.fasta", format='fasta', nbc0l =
-1, colsep = "", colw = 1000000)

fwd = readsangerseq("Sanger_isolates/30F.F.ab1")
rev = readsangerseq("Sanger_isolates/30R.R.ab1")
fwd = primarySeq(fwd)
rev = primarySeq(rev)
rev = reverseComplement(rev)
reads = DNASTringSet(c(as.character(fwd), as.character(rev)))
names(reads) = c('fwd', 'rev')
merged.reads = merge.reads(reads)

## [1] "Aligning reads"
## [1] "Calling consensus sequence"
## [1] "Calculating differences between reads and consensus"

names(merged.reads)

## [1] "consensus" "alignment"
## [3] "differences" "distance.matrix"

```

```

## [5] "dendrogram"          "indels"
## [7] "stop.codons"           "secondary.peak.columns"

merged.reads

## $consensus
## 1285-letter "DNASTring" instance
## seq: GGCAGCTTGCTGCTTTGCTGACGAGTGGCGGACG...CGACTCCATGAAGTCGGAATCGCTGTAATCGT
N
##
## $alignment
## A DNASTringSet instance of length 3
## width seq names
## [1] 1285 GGCAGCTTGCTGCTTTGCTGA...----- fwd
## [2] 1285 -----...TCGGAATCGCTGTAATCGTN rev
## [3] 1285 GGCAGCTTGCTGCTTTGCTGA...TCGGAATCGCTGTAATCGTN consensus
##
## $differences
## name pairwise.diffs.to.consensus unused.chars
## 1 fwd 40 0
## 2 rev 35 0
##
## $distance.matrix
## fwd rev
## fwd 0.00000000 0.06081996
## rev 0.06081996 0.00000000
## attr(,"correction")
## [1] "Jukes-Cantor"
##
## $dendrogram
## 'dendrogram' with 2 branches and 2 members total, at height 0.03040998
##
## $indels
## NULL
##
## $stop.codons
## NULL
##
## $secondary.peak.columns
## NULL
##
## attr(,"class")
## [1] "merged.read"

merged.reads$consensus

## 1285-letter "DNASTring" instance
## seq: GGCAGCTTGCTGCTTTGCTGACGAGTGGCGGACG...CGACTCCATGAAGTCGGAATCGCTGTAATCGT
N

```

```

BrowseSeqs(merged.reads$alignment)
merged.reads$secondary.peak.columns

## NULL

merged.reads$differences

##   name pairwise.diffs.to.consensus unused.chars
## 1 fwd                               40          0
## 2 rev                               35          0

write.dna(merged.reads, file="Sanger_isolates/30.fasta", format='fasta', nbc1 =
-1, colsep = "", colw = 1000000)

fwd = readsangerseq("Sanger_isolates/95F.F.ab1")
rev = readsangerseq("Sanger_isolates/95R.R.ab1")
fwd = primarySeq(fwd)
rev = primarySeq(rev)
rev = reverseComplement(rev)
reads = DNASTringSet(c(as.character(fwd), as.character(rev)))
names(reads) = c('fwd', 'rev')
merged.reads = merge.reads(reads)

## [1] "Aligning reads"
## [1] "Calling consensus sequence"
## [1] "Calculating differences between reads and consensus"

names(merged.reads)

## [1] "consensus"           "alignment"
## [3] "differences"          "distance.matrix"
## [5] "dendrogram"           "indels"
## [7] "stop.codons"          "secondary.peak.columns"

merged.reads

## $consensus
## 1289-letter "DNASTring" instance
## seq: NNGCTCTTATGAGGTTAGCGGCGGACGGGTGAGT...TACATGAAGCTGGAATCGCTAGTAATCGCGAT
C
##
## $alignment
## A DNASTringSet instance of length 3
##   width seq                                     names
## [1] 1289 NNGCTCTTATGAGGTTAGCGG...----- fwd
## [2] 1289 -----...AATCGCTAGTAATCGCGATC rev
## [3] 1289 NNGCTCTTATGAGGTTAGCGG...AATCGCTAGTAATCGCGATC consensus
##
## $differences
##   name pairwise.diffs.to.consensus unused.chars
## 1 fwd                               66          0
## 2 rev                               62          0

```



```

##
## $distance.matrix
##      fwd      rev
## fwd 0.00000000 0.09751936
## rev 0.09751936 0.00000000
## attr("correction")
## [1] "Jukes-Cantor"
##
## $dendrogram
## 'dendrogram' with 2 branches and 2 members total, at height 0.04875968
##
## $indels
## NULL
##
## $stop.codons
## NULL
##
## $secondary.peak.columns
## NULL
##
## attr("class")
## [1] "merged.read"

merged.reads$consensus

## 1289-letter "DNASTring" instance
## seq: NNGCTCTTATGAGGTTAGCGCGGACGGGTGAGT...TACATGAAGCTGGAATCGCTAGTAATCGCGAT
C

BrowseSeqs(merged.reads$alignment)
merged.reads$secondary.peak.columns

## NULL

merged.reads$differences

## name pairwise.diffs.to.consensus unused.chars
## 1 fwd 66 0
## 2 rev 62 0

write.dna(merged.reads, file="Sanger_isolates/95.fasta", format='fasta', nbc0l =
-1, colsep = "", colw = 1000000)

fwd = readsangerseq("Sanger_isolates/98F.F.ab1")
rev = readsangerseq("Sanger_isolates/98R.R.ab1")
fwd = primarySeq(fwd)
rev = primarySeq(rev)
rev = reverseComplement(rev)
reads = DNASTringSet(c(as.character(fwd), as.character(rev)))
names(reads) = c('fwd', 'rev')
merged.reads = merge.reads(reads)

```

```

## [1] "Aligning reads"
## [1] "Calling consensus sequence"
## [1] "Calculating differences between reads and consensus"

names(merged.reads)

## [1] "consensus"          "alignment"
## [3] "differences"        "distance.matrix"
## [5] "dendrogram"        "indels"
## [7] "stop.codons"       "secondary.peak.columns"

merged.reads

## $consensus
## 737-letter "DNASTring" instance
## seq: NNAGCGAGKRRCSWCSGCKGMKTRRSWSCSKGKAG...CWYSMMKWCSGARTYSCWTGYAMKCKMGRTYA
G
##
## $alignment
## A DNASTringSet instance of length 3
## width seq names
## [1] 737 NNAGCGAGTGGCGACGGCTGA...NCCCATGCACGCTAGGTT-- fwd
## [2] 737 -----GGAACCTCCGCGGC...TTGCTNGTAATCGCGATCAG rev
## [3] 737 NNAGCGAGKRRCSWCSGCKGM...TYSJWTGYAMKCKMGRTYAG consensus
##
## $differences
## name pairwise.diffs.to.consensus unused.chars
## 1 fwd 399 0
## 2 rev 394 0
##
## $distance.matrix
## fwd rev
## fwd 0.000000 1.029787
## rev 1.029787 0.000000
## attr(,"correction")
## [1] "Jukes-Cantor"
##
## $dendrogram
## 'dendrogram' with 2 branches and 2 members total, at height 0.5148934
##
## $indels
## NULL
##
## $stop.codons
## NULL
##
## $secondary.peak.columns
## NULL
##
## attr(,"class")
## [1] "merged.read"

```

```

merged.reads$consensus

## 737-letter "DNASTring" instance
## seq: NNAGCGAGKRRCSWCSGCKGMKTRRSWCSKKGAG...CWYSMMKWCSGARTYSCWTGYAMKCKMGRTYA
G

BrowseSeqs(merged.reads$alignment)
merged.reads$secondary.peak.columns

## NULL

merged.reads$differences

## name pairwise.diffs.to.consensus unused.chars
## 1 fwd 399 0
## 2 rev 394 0

write.dna(merged.reads, file="Sanger_isolates/98.fasta", format='fasta', nbc1 =
-1, colsep = "", colw = 1000000)

fwd = readsangerseq("Sanger_isolates/137F.F.ab1")
rev = readsangerseq("Sanger_isolates/137R.R.ab1")
fwd = primarySeq(fwd)
rev = primarySeq(rev)
rev = reverseComplement(rev)
reads = DNASTringSet(c(as.character(fwd), as.character(rev)))
names(reads) = c('fwd', 'rev')
merged.reads = merge.reads(reads)

## [1] "Aligning reads"
## [1] "Calling consensus sequence"
## [1] "Calculating differences between reads and consensus"

names(merged.reads)

## [1] "consensus" "alignment"
## [3] "differences" "distance.matrix"
## [5] "dendrogram" "indels"
## [7] "stop.codons" "secondary.peak.columns"

merged.reads

## $consensus
## 1276-letter "DNASTring" instance
## seq: GTTGGAGAGTTGCGAACGGGTGAGTAACGCGTAG...ATGAAGTCGGAATCGCTAGTAATCGCGGATCA
G
##
## $alignment
## A DNASTringSet instance of length 3
## width seq names
## [1] 1276 GTTGGAGAGTTGCGAACGGGT...----- fwd
## [2] 1276 -----...CGCTAGTAATCGCGGATCAG rev

```

```

## [3] 1276 GTTGGAGAGTTGCGAACGGGT...CGCTAGTAATCGCGGATCAG consensus
##
## $differences
##   name pairwise.diffs.to.consensus unused.chars
## 1 fwd                                6           0
## 2 rev                                6           0
##
## $distance.matrix
##           fwd           rev
## fwd 0.00000000 0.03922462
## rev 0.03922462 0.00000000
## attr(,"correction")
## [1] "Jukes-Cantor"
##
## $dendrogram
## 'dendrogram' with 2 branches and 2 members total, at height 0.01961231
##
## $indels
## NULL
##
## $stop.codons
## NULL
##
## $secondary.peak.columns
## NULL
##
## attr(,"class")
## [1] "merged.read"

merged.reads$consensus

## 1276-letter "DNASTring" instance
## seq: GTTGGAGAGTTGCGAACGGGTGAGTAACGCGTAG...ATGAAGTCGGAATCGCTAGTAATCGCGGATCA
G

BrowseSeqs(merged.reads$alignment)
merged.reads$secondary.peak.columns

## NULL

merged.reads$differences

##   name pairwise.diffs.to.consensus unused.chars
## 1 fwd                                6           0
## 2 rev                                6           0

write.dna(merged.reads,file="Sanger_isolates/137.fasta",format='fasta',nbcol
= -1, colsep = "", colw = 1000000)

fwd = readsangerseq("Sanger_isolates/138F.F.ab1")
rev = readsangerseq("Sanger_isolates/138R.R.ab1")

```

```

fwd = primarySeq(fwd)
rev = primarySeq(rev)
rev = reverseComplement(rev)
reads = DNASTringSet(c(as.character(fwd), as.character(rev)))
names(reads) = c('fwd', 'rev')
merged.reads = merge.reads(reads)

## [1] "Aligning reads"
## [1] "Calling consensus sequence"
## [1] "Calculating differences between reads and consensus"

names(merged.reads)

## [1] "consensus"           "alignment"
## [3] "differences"         "distance.matrix"
## [5] "dendrogram"         "indels"
## [7] "stop.codons"        "secondary.peak.columns"

merged.reads

## $consensus
## 1297-letter "DNASTring" instance
## seq: TGACTGCTCTGCCTCCTGATTGAATAATCGTTTG...TGAAGCCGGAATCGCTAGTAATCGCGGATCAG
C
##
## $alignment
## A DNASTringSet instance of length 3
## width seq names
## [1] 1297 TGACTGCTCTGCCTCCTGATT...----- fwd
## [2] 1297 -----...GCTAGTAATCGCGGATCAGC rev
## [3] 1297 TGACTGCTCTGCCTCCTGATT...GCTAGTAATCGCGGATCAGC consensus
##
## $differences
## name pairwise.diffs.to.consensus unused.chars
## 1 fwd 59 0
## 2 rev 59 0
##
## $distance.matrix
## fwd rev
## fwd 0.0000000 0.2335444
## rev 0.2335444 0.0000000
## attr(,"correction")
## [1] "Jukes-Cantor"
##
## $dendrogram
## 'dendrogram' with 2 branches and 2 members total, at height 0.1167722
##
## $indels
## NULL
##
## $stop.codons

```

```

## NULL
##
## $secondary.peak.columns
## NULL
##
## attr(,"class")
## [1] "merged.read"

merged.reads$consensus

## 1297-letter "DNAString" instance
## seq: TGACTGCTCTGCCTCCTGATTGAATAATCGTTTG...TGAAGCCGGAATCGCTAGTAATCGCGGATCAG
C

BrowseSeqs(merged.reads$alignment)
merged.reads$secondary.peak.columns

## NULL

merged.reads$differences

## name pairwise.diffs.to.consensus unused.chars
## 1 fwd 59 0
## 2 rev 59 0

write.dna(merged.reads,file="Sanger_isolates/138.fasta",format='fasta',nbc
ol = -1, colsep = "", colw = 1000000)

fwd = readsangerseq("Sanger_isolates/152F.F.ab1")
rev = readsangerseq("Sanger_isolates/152R.R.ab1")
fwd = primarySeq(fwd)
rev = primarySeq(rev)
rev = reverseComplement(rev)
reads = DNAStringSet(c(as.character(fwd), as.character(rev)))
names(reads) = c('fwd', 'rev')
merged.reads = merge.reads(reads)

## [1] "Aligning reads"
## [1] "Calling consensus sequence"
## [1] "Calculating differences between reads and consensus"

names(merged.reads)

## [1] "consensus" "alignment"
## [3] "differences" "distance.matrix"
## [5] "dendrogram" "indels"
## [7] "stop.codons" "secondary.peak.columns"

merged.reads

## $consensus
## 1288-letter "DNAString" instance
## seq: GCTCACCGAAAGAGGAGTGGCGAACGGGTGAGT...TGAAGCCGGAATCGCTAGTAATCGCGGATCAG

```

```

C
##
## $alignment
##   A DNASTringSet instance of length 3
##     width seq                                     names
## [1] 1288 GCTCACCGGAAAGAGGAGTGG...----- fwd
## [2] 1288 -----...GCTAGTAATCGCGGATCAGC rev
## [3] 1288 GCTCACCGGAAAGAGGAGTGG...GCTAGTAATCGCGGATCAGC consensus
##
## $differences
##   name pairwise.diffs.to.consensus unused.chars
## 1 fwd                               8           0
## 2 rev                               8           0
##
## $distance.matrix
##           fwd           rev
## fwd 0.00000000 0.04859999
## rev 0.04859999 0.00000000
## attr(,"correction")
## [1] "Jukes-Cantor"
##
## $dendrogram
## 'dendrogram' with 2 branches and 2 members total, at height 0.0243
##
## $indels
## NULL
##
## $stop.codons
## NULL
##
## $secondary.peak.columns
## NULL
##
## attr(,"class")
## [1] "merged.read"

merged.reads$consensus

## 1288-letter "DNASTring" instance
## seq: GCTCACCGGAAAGAGGAGTGGCGAACGGGTGAGT...TGAAGCCGGAATCGCTAGTAATCGCGGATCAG
C

BrowseSeqs(merged.reads$alignment)
merged.reads$secondary.peak.columns

## NULL

merged.reads$differences

```

```

## name pairwise.diffs.to.consensus unused.chars
## 1 fwd 8 0
## 2 rev 8 0

write.dna(merged.reads, file="Sanger_isolates/152.fasta", format='fasta', nbc
= -1, colsep = "", colw = 1000000)

fwd = readsangerseq("Sanger_isolates/142F.F.ab1")
rev = readsangerseq("Sanger_isolates/142R.R.ab1")
fwd = primarySeq(fwd)
rev = primarySeq(rev)
rev = reverseComplement(rev)
reads = DNASTringSet(c(as.character(fwd), as.character(rev)))
names(reads) = c('fwd', 'rev')
merged.reads = merge.reads(reads)

## [1] "Aligning reads"
## [1] "Calling consensus sequence"
## [1] "Calculating differences between reads and consensus"

names(merged.reads)

## [1] "consensus" "alignment"
## [3] "differences" "distance.matrix"
## [5] "dendrogram" "indels"
## [7] "stop.codons" "secondary.peak.columns"

merged.reads

## $consensus
## 733-letter "DNASTring" instance
## seq: AGTCTTCTAGTAGMRGSKTRSTRSWTCGCYSASG...RAWTCGSYRWAATSGTRWWMAGATTGAACGCT
C
##
## $alignment
## A DNASTringSet instance of length 3
## width seq names
## [1] 733 -----AGCAGCTTGC...GGTATAAAGATTGAACGCTC fwd
## [2] 733 AGTCTTCTAGTAGAGGGGTAG...CGTGATCAG----- rev
## [3] 733 AGTCTTCTAGTAGMRGSKTRS...SGTRWWMAGATTGAACGCTC consensus
##
## $differences
## name pairwise.diffs.to.consensus unused.chars
## 1 fwd 367 0
## 2 rev 367 0
##
## $distance.matrix
## fwd rev
## fwd 0.000000 1.011149
## rev 1.011149 0.000000
## attr(,"correction")

```



```

## [1] "Jukes-Cantor"
##
## $dendrogram
## 'dendrogram' with 2 branches and 2 members total, at height 0.5055747
##
## $indels
## NULL
##
## $stop.codons
## NULL
##
## $secondary.peak.columns
## NULL
##
## attr(,"class")
## [1] "merged.read"

merged.reads$consensus

## 733-letter "DNASTring" instance
## seq: AGTCTTCTAGTAGMRGSKTRSTRSWTCGCYSASG...RAWTCGSYRWAATSGTRWWMAGATTGAACGCT
C

BrowseSeqs(merged.reads$alignment)
merged.reads$secondary.peak.columns

## NULL

merged.reads$differences

## name pairwise.diffs.to.consensus unused.chars
## 1 fwd 367 0
## 2 rev 367 0

write.dna(merged.reads, file="Sanger_isolates/142.fasta", format='fasta', nbc1
= -1, colsep = "", colw = 1000000)

fwd = readsangerseq("Sanger_isolates/184F.F.ab1")
rev = readsangerseq("Sanger_isolates/184R.R.ab1")
fwd = primarySeq(fwd)
rev = primarySeq(rev)
rev = reverseComplement(rev)
reads = DNASTringSet(c(as.character(fwd), as.character(rev)))
names(reads) = c('fwd', 'rev')
merged.reads = merge.reads(reads)

## [1] "Aligning reads"
## [1] "Calling consensus sequence"
## [1] "Calculating differences between reads and consensus"

names(merged.reads)

```

```

## [1] "consensus"           "alignment"
## [3] "differences"            "distance.matrix"
## [5] "dendrogram"           "indels"
## [7] "stop.codons"          "secondary.peak.columns"

merged.reads

## $consensus
## 1281-letter "DNASTring" instance
## seq: GCTTGACTGAGATGGCGACCGGCGCACGGGTGA...GTGAAGCTGGATTCGCTAGTAATCGCGCATCA
G
##
## $alignment
## A DNASTringSet instance of length 3
##      width seq                      names
## [1] 1281 GCTTGACTGAGATGGCGACC...----- fwd
## [2] 1281 -----...CGCTAGTAATCGCGCATCAG rev
## [3] 1281 GCTTGACTGAGATGGCGACC...CGCTAGTAATCGCGCATCAG consensus
##
## $differences
##      name pairwise.diffs.to.consensus unused.chars
## 1 fwd                      114          0
## 2 rev                      114          0
##
## $distance.matrix
##           fwd      rev
## fwd 0.0000000 0.1589253
## rev 0.1589253 0.0000000
## attr(,"correction")
## [1] "Jukes-Cantor"
##
## $dendrogram
## 'dendrogram' with 2 branches and 2 members total, at height 0.07946267
##
## $indels
## NULL
##
## $stop.codons
## NULL
##
## $secondary.peak.columns
## NULL
##
## attr(,"class")
## [1] "merged.read"

merged.reads$consensus

## 1281-letter "DNASTring" instance
## seq: GCTTGACTGAGATGGCGACCGGCGCACGGGTGA...GTGAAGCTGGATTCGCTAGTAATCGCGCATCA
G

```

```

BrowseSeqs(merged.reads$alignment)
merged.reads$secondary.peak.columns

## NULL

merged.reads$differences

##   name pairwise.diffs.to.consensus unused.chars
## 1  fwd                               114         0
## 2  rev                               114         0

write.dna(merged.reads, file="Sanger_isolates/184.fasta", format='fasta', nbc
= -1, colsep = "", colw = 1000000)

fwd = readsangerseq("Sanger_isolates/185F.F.ab1")
rev = readsangerseq("Sanger_isolates/185R.R.ab1")
fwd = primarySeq(fwd)
rev = primarySeq(rev)
rev = reverseComplement(rev)
reads = DNASTringSet(c(as.character(fwd), as.character(rev)))
names(reads) = c('fwd', 'rev')
merged.reads = merge.reads(reads)

## [1] "Aligning reads"
## [1] "Calling consensus sequence"
## [1] "Calculating differences between reads and consensus"

names(merged.reads)

## [1] "consensus"           "alignment"
## [3] "differences"          "distance.matrix"
## [5] "dendrogram"           "indels"
## [7] "stop.codons"          "secondary.peak.columns"

merged.reads

## $consensus
## 1286-letter "DNASTring" instance
## seq: GCACTGAGATGGCGACCGGCGCACGGGTGAGTAA...CGTGAAGCTGGATTCGCTAGTAATCGCGCATC
A
##
## $alignment
## A DNASTringSet instance of length 3
##   width seq                                     names
## [1] 1286 GCACTGAGATGGCGACCGGCG...----- fwd
## [2] 1286 -----...TCGCTAGTAATCGCGCATCA rev
## [3] 1286 GCACTGAGATGGCGACCGGCG...TCGCTAGTAATCGCGCATCA consensus
##
## $differences
##   name pairwise.diffs.to.consensus unused.chars
## 1  fwd                               45         0
## 2  rev                               45         0

```

```

##
## $distance.matrix
##      fwd      rev
## fwd 0.00000000 0.07544043
## rev 0.07544043 0.00000000
## attr("correction")
## [1] "Jukes-Cantor"
##
## $dendrogram
## 'dendrogram' with 2 branches and 2 members total, at height 0.03772021
##
## $indels
## NULL
##
## $stop.codons
## NULL
##
## $secondary.peak.columns
## NULL
##
## attr("class")
## [1] "merged.read"

merged.reads$consensus

## 1286-letter "DNASTring" instance
## seq: GCACTGAGATGGCGACCGGCGCACGGGTGAGTAA...CGTGAAGCTGGATTTCGCTAGTAATCGCGCATC
A

BrowseSeqs(merged.reads$alignment)
merged.reads$secondary.peak.columns

## NULL

merged.reads$differences

## name pairwise.diffs.to.consensus unused.chars
## 1 fwd 45 0
## 2 rev 45 0

write.dna(merged.reads, file="Sanger_isolates/185.fasta", format='fasta', nbc
= -1, colsep = "", colw = 1000000)

fwd = readsangerseq("Sanger_isolates/186F.F.ab1")
rev = readsangerseq("Sanger_isolates/186R.R.ab1")
fwd = primarySeq(fwd)
rev = primarySeq(rev)
rev = reverseComplement(rev)
reads = DNASTringSet(c(as.character(fwd), as.character(rev)))
names(reads) = c('fwd', 'rev')
merged.reads = merge.reads(reads)

```

```

## [1] "Aligning reads"
## [1] "Calling consensus sequence"
## [1] "Calculating differences between reads and consensus"

names(merged.reads)

## [1] "consensus"          "alignment"
## [3] "differences"         "distance.matrix"
## [5] "dendrogram"         "indels"
## [7] "stop.codons"        "secondary.peak.columns"

merged.reads

## $consensus
## 1270-letter "DNASTring" instance
## seq: GCAACTGAGATGGCGACCGGCGCACGGGTGAGTA...CGTGAAGCTGGATTTCGCTAGTAATCGCGCATC
A
##
## $alignment
## A DNASTringSet instance of length 3
## width seq names
## [1] 1270 GCAACTGAGATGGCGACCGGC...----- fwd
## [2] 1270 -----...TCGCTAGTAATCGCGCATCA rev
## [3] 1270 GCAACTGAGATGGCGACCGGC...TCGCTAGTAATCGCGCATCA consensus
##
## $differences
## name pairwise.diffs.to.consensus unused.chars
## 1 fwd 26 0
## 2 rev 26 0
##
## $distance.matrix
## fwd rev
## fwd 0.00000000 0.07729607
## rev 0.07729607 0.00000000
## attr("correction")
## [1] "Jukes-Cantor"
##
## $dendrogram
## 'dendrogram' with 2 branches and 2 members total, at height 0.03864803
##
## $indels
## NULL
##
## $stop.codons
## NULL
##
## $secondary.peak.columns
## NULL
##
## attr("class")
## [1] "merged.read"

```

```
merged.reads$consensus

## 1270-letter "DNASTring" instance
## seq: GCAACTGAGATGGCGACCGGCGCACGGGTGAGTA...CGTGAAGCTGGATTTCGCTAGTAATCGCGCATC
A

BrowseSeqs(merged.reads$alignment)
merged.reads$secondary.peak.columns

## NULL

merged.reads$differences

## name pairwise.diffs.to.consensus unused.chars
## 1 fwd 26 0
## 2 rev 26 0

write.dna(merged.reads, file="Sanger_isolates/186.fasta", format='fasta', nbcol
= -1, colsep = "", colw = 1000000)
```

## Most similar OTUs for each Sanger read

A reference alignment was built from the Sanger reads (for each donor separately) applying the `sina` aligner (Pruesse et al. 2012). OTUs were aligned to this reference Sanger alignment in `mothur` (`align.seqs`), yielding a report with the closest Sanger reference for each OTU based on `kmer` searching (Schloss et al. 2009). The report for each donor was loaded into R, version 3.4.2 (2017-09-28) (R Core Team 2016). For each isolate in the report, the top two OTUs with the highest `SearchScores` were selected. A `fasta` file was constructed containing these OTUs.

```
# Donor1
donor1topotusanger <- read.table('DataS13.report', header=TRUE)
donor1topotusanger <- donor1topotusanger[order(donor1topotusanger$TemplateName,
-donor1topotusanger$SearchScore),]
donor1topotusanger <- donor1topotusanger %>% group_by(TemplateName) %>% dplyr::slice(1:2)
# find these otu's in the fasta
donor1fastaotusforfylogeny <- read.table(DataS17.fasta')
donor1fastaotusforfylogeny <- donor1fastaotusforfylogeny[donor1fastaotusforfylogeny$V1%in%donor1topotusanger$QueryName,]
wantedforfylogeny1 <- paste(RDPtax_noprob[donor1fastaotusforfylogeny$V1,]$Genus, donor1fastaotusforfylogeny$V1, sep=" ")
donor1fastaotusforfylogeny$V1 <- paste(RDPtax_noprob[donor1fastaotusforfylogeny$V1,]$Genus, donor1fastaotusforfylogeny$V1, sep="_")
write.csv2(donor1fastaotusforfylogeny, "donor1fastaotusforfylogeny.csv", row.names=FALSE, col.names=FALSE)

# Donor2
donor2topotusanger <- read.table('DataS14.report', header=TRUE)
donor2topotusanger <- donor2topotusanger[order(donor2topotusanger$TemplateName,
-donor2topotusanger$SearchScore),]
```

```

donor2topotusanger <- donor2topotusanger%>%group_by(TemplateName) %>%dplyr::sli
lice(1:2)
donor2fastaotusforfylogeny <- read.table('DataS17.fasta')
donor2fastaotusforfylogeny <- donor2fastaotusforfylogeny[donor2fastaotusforfy
logeny$V1%in%donor2topotusanger$QueryName,]
wantedforfylogeny2 <-paste(RDPtax_noprob[donor2fastaotusforfylogeny$V1,]$Genu
s,donor2fastaotusforfylogeny$V1,sep=" ")
donor2fastaotusforfylogeny$V1 <- paste(RDPtax_noprob[donor2fastaotusforfyloge
ny$V1,]$Genus,donor2fastaotusforfylogeny$V1,sep="_")
write.csv2(donor2fastaotusforfylogeny,"donor2fastaotusforfylogeny.csv",row.na
mes=FALSE,col.names=FALSE)

```

#### # Donor3

```

donor3topotusanger <- read.table('DataS15.report',header=TRUE)
donor3topotusanger <- donor3topotusanger[order(donor3topotusanger$TemplateNam
e,-donor3topotusanger$SearchScore),]
donor3topotusanger <-donor3topotusanger%>%group_by(TemplateName) %>%dplyr::sli
lice(1:2)
donor3fastaotusforfylogeny <- read.table('DataS17.fasta')
donor3fastaotusforfylogeny <- donor3fastaotusforfylogeny[donor3fastaotusforfy
logeny$V1%in%donor3topotusanger$QueryName,]
wantedforfylogeny3 <-paste(RDPtax_noprob[donor3fastaotusforfylogeny$V1,]$Genu
s,donor3fastaotusforfylogeny$V1,sep=" ")
donor3fastaotusforfylogeny$V1 <- paste(RDPtax_noprob[donor3fastaotusforfyloge
ny$V1,]$Genus,donor3fastaotusforfylogeny$V1,sep="_")
write.csv2(donor3fastaotusforfylogeny,"donor3fastaotusforfylogeny.csv",row.na
mes=FALSE,col.names=FALSE)

```

#### # Donor4

```

donor4topotusanger <- read.table('DataS16.report',header=TRUE)
donor4topotusanger <- donor4topotusanger[order(donor4topotusanger$TemplateNam
e,-donor4topotusanger$SearchScore),]
donor4topotusanger <-donor4topotusanger%>%group_by(TemplateName) %>%dplyr::sli
lice(1:2)
donor4fastaotusforfylogeny <- read.table('DataS18.fasta')
donor4fastaotusforfylogeny <- donor4fastaotusforfylogeny[donor4fastaotusforfy
logeny$V1%in%donor4topotusanger$QueryName,]
wantedforfylogeny4 <-paste(RDPtax4_noprob[donor4fastaotusforfylogeny$V1,]$Gen
us,donor4fastaotusforfylogeny$V1,sep=" ")
donor4fastaotusforfylogeny$V1 <- paste(RDPtax4_noprob[donor4fastaotusforfylog
eny$V1,]$Genus,donor4fastaotusforfylogeny$V1,sep="_")
write.csv2(donor4fastaotusforfylogeny,"donor4fastaotusforfylogeny.csv",row.na
mes=FALSE,col.names=FALSE)

```

## Create metadata for the annotation of iTOL phylogenetic trees

In order to compare the OTUs spanning the V4 region of the 16S rRNA gene with the near full-length Sanger reads, the RAxML implementation of the evolutionary placement algorithm of short reads, as introduced by Berger et al. (2011), was used (Stamatakis 2014). The bootstrap supported maximum likelihood (ML) phylogenetic reference tree was also constructed using RAxML, selecting the General Time Reversible model of nucleotide substitution under the Gamma model of rate heterogeneity (GTRGAMMA) with the parsimony random seed set to 12345. The rapid bootstrap analysis was conducted starting from N=1000 distinct randomized maximum parsimony trees and was followed by a search for the best-scoring ML tree with rapid bootstrap random number seed 123 (Stamatakis 2014). The best scoring ML tree with the OTU short read insertions was visualized in iTOL (Letunic & Bork 2016). Metadata for the annotation of the iTOL trees is created in the chunks below.

```
currentotuname1 <- donor1fastaotusforfylogeny$V1
RAXMLotuname1 <- paste("QUERY___",currentotuname1,sep="")
otuname1df <- cbind(currentname1=RAXMLotuname1,wantedname1=wantedforfylogeny1
)

wantedsangername1 <- splittax(read.table('DataS19.taxonomy'),'seqs')
wantedsangername1$Genus <- mapvalues(wantedsangername1$Genus,from=c("Enterobacteriaceae_unclassified","Erysipelotrichaceae_unclassified","Lachnospiraceae_unclassified","Lactobacillales_unclassified","Actinobacteria_unclassified","Burkholderiales_unclassified","Clostridiales_unclassified"),to=c("Enterobacteriaceae","Erysipelotrichaceae","Lachnospiraceae","Lactobacillales","Actinobacteria","Burkholderiales","Clostridiales"))
currentsangername1 <- as.character(wantedsangername1$id)
wantedsangername1 <- as.character(paste(wantedsangername1$id,wantedsangername1$Genus))
sangername1df <- cbind(currentname1=currentsangername1,wantedname1=wantedsangername1)

itolname1 <- data.frame(rbind(otuname1df,sangername1df))
itolname1$itolcode <- paste(itolname1$currentname1,",",itolname1$wantedname1,sep="")
itollabel1<- c("LABELS","SEPARATOR COMMA","DATA",itolname1$itolcode)
write.table(itollabel1,"itollabel1.txt",row.names=FALSE,col.names=FALSE,quote=FALSE)

#style labels
itollabelstyle1 <- paste(currentsangername1,",label",",#000000",",bold",",1",sep="")
itollabelstyle1<- c("TREE_COLORS","SEPARATOR COMMA","DATA",itollabelstyle1)
write.table(itollabelstyle1,"itollabelstyle1.txt",row.names=FALSE,col.names=FALSE,quote=FALSE)

# Stacked bar charts of the relative abundance
propbar1 <- subset(shared3mingsingletonwnwnprop*100,select=c(Donor1_high4_L.V4
```



```

,Donor1_low4_L.V4,FS_1_isolationhigh.V4))
propbar1 <- propbar1[rownames(propbar1)%in%donor1topotusanger$QueryName,]
propbar1 <- round(propbar1,2)
propbar1 <- rownames_to_column(propbar1)
propbar1$rowname <- paste(RDPtax_noprob[propbar1$rowname,]$Genus,propbar1$rowname,sep="_")
propbar1$rowname<- paste("QUERY___",propbar1$rowname,sep="")
propbar1$high <- paste(",",propbar1$Donor1_high4_L.V4,sep="")
propbar1$low<- paste(",",propbar1$Donor1_low4_L.V4,sep="")
propbar1$FS <- paste(",",propbar1$FS_1_isolationhigh.V4,sep="")
propbar1 <- propbar1[,-c(2:4)]
propbar1 <- rbind(c("DATA","", "", ""),propbar1)
propbar1 <- rbind(c("DATASET_SCALE","", "10","", "25","", "50"),propbar1)
propbar1 <- rbind(c("ALIGN_FIELDS","", "0","", ""),propbar1)
propbar1 <- rbind(c("LEGEND_TITLE","", "Relative abundance (%)","", ""),propbar1)
propbar1 <- rbind(c("LEGEND_SHAPES","", "1","", "1","", "1"),propbar1)
propbar1 <- rbind(c("LEGEND_COLORS","", "#323C4D","", "#A03D44","", "#98B736"),propbar1)
propbar1 <- rbind(c("LEGEND_LABELS","", "pH6.8","", "pH5.8","", "Fecal slurry"),propbar1)
propbar1 <- rbind(c("WIDTH","", "350","", ""),propbar1)
propbar1 <- rbind(c("FIELD_COLORS","", "#323C4D","", "#A03D44","", "#98B736"),propbar1)
propbar1 <- rbind(c("FIELD_LABELS","", "f1","", "f2","", "f3"),propbar1)
propbar1 <- rbind(c("COLOR","", "#ff0000","", ""),propbar1)
propbar1 <- rbind(c("DATASET_LABEL","", "barchart","", ""),propbar1)
propbar1 <- rbind(c("SEPARATOR","", "COMMA","", ""),propbar1)
propbar1 <- rbind(c("DATASET_MULTIBAR","", "", "", ""),propbar1)
write.table(propbar1, "itolpropbar1.txt", col.names=FALSE, row.names=FALSE, sep=" ", quote=FALSE)

currentotuname2 <- donor2fastaotusforfylogeny$V1
RAXMLotuname2 <- paste("QUERY___",currentotuname2,sep="")
otuname2df <- cbind(currentname2=RAXMLotuname2,wantedname2=wantedforfylogeny2)

wantsangname2 <- splittax(read.table('DataS20.taxonomy'),"seqs")
wantsangname2$Genus <- mapvalues(wantsangname2$Genus,from=c("Enterobacteriaceae_unclassified","Erysipelotrichaceae_unclassified","Lachnospiraceae_unclassified","Lactobacillales_unclassified","Actinobacteria_unclassified","Burkholderiales_unclassified","Clostridiales_unclassified"),to=c("Enterobacteriaceae","Erysipelotrichaceae","Lachnospiraceae","Lactobacillales","Actinobacteria","Burkholderiales","Clostridiales"))
currentsangname2 <- as.character(wantsangname2$id)
wantsangname2 <- as.character(paste(wantsangname2$id,wantsangname2$Genus))
sangname2df <- cbind(currentname2=currentsangname2,wantedname2=wantsangname2)

itolname2 <- data.frame(rbind(otuname2df, sangname2df))

```

```

itolname2$itolcode <- paste(itolname2$currentname2,"",itolname2$wantedname2,
sep="")
itollabel2<- c("LABELS","SEPARATOR COMMA","DATA",itolname2$itolcode)
write.table(itollabel2,"itollabel2.txt",row.names=FALSE,col.names=FALSE,quote
=FALSE)

#style Labels
itollabelstyle2 <- paste(currentsangername2,"label",",#000000",",bold",",1",
sep="")
itollabelstyle2<- c("TREE_COLORS","SEPARATOR COMMA","DATA",itollabelstyle2)
write.table(itollabelstyle2,"itollabelstyle2.txt",row.names=FALSE,col.names=F
ALSE,quote=FALSE)

# Stacked bar charts of the relative abundance
propbar2 <- subset(shared3mingsingletonwnwnprop*100,select=c(Donor2_high4_L.V4
,Donor2_low4_L.V4,FS_2_isolationhigh.V4))
propbar2 <- propbar2[rownames(propbar2)%in%donor2topotusanger$QueryName,]
propbar2 <- round(propbar2,2)
propbar2 <- rownames_to_column(propbar2)
propbar2$rowname <-paste(RDPtax_noprof[propbar2$rowname,]$Genus,propbar2$rowname,sep="_")
propbar2$rowname<- paste("QUERY___",propbar2$rowname,sep="")
propbar2$high <- paste(",",propbar2$Donor2_high4_L.V4,sep="")
propbar2$low<- paste(",",propbar2$Donor2_low4_L.V4,sep="")
propbar2$FS <- paste(",",propbar2$FS_2_isolationhigh.V4,sep="")
propbar2 <- propbar2[,-c(2:4)]
propbar2 <- rbind(c("DATA", "", "", ""),propbar2)
propbar2 <- rbind(c("DATASET_SCALE", "", "5", "", "10", "", "25"),propbar2)
propbar2 <- rbind(c("ALIGN_FIELDS", "", "0", "", ""),propbar2)
propbar2 <- rbind(c("LEGEND_TITLE", "", "Relative abundance (%)", "", ""),propbar2)
propbar2 <- rbind(c("LEGEND_SHAPES", "", "1", "", "1", "", "1"),propbar2)
propbar2 <- rbind(c("LEGEND_COLORS", "", "#323C4D", "", "#A03D44", "", "#98B736"),propbar2)
propbar2 <- rbind(c("LEGEND_LABELS", "", "pH6.8", "", "pH5.8", "", "Fecal slurry"),propbar2)
propbar2 <- rbind(c("WIDTH", "", "350", "", ""),propbar2)
propbar2 <- rbind(c("FIELD_COLORS", "", "#323C4D", "", "#A03D44", "", "#98B736"),propbar2)
propbar2 <- rbind(c("FIELD_LABELS", "", "f1", "", "f2", "", "f3"),propbar2)
propbar2 <- rbind(c("COLOR", "", "#ff0000", "", ""),propbar2)
propbar2 <- rbind(c("DATASET_LABEL", "", "barchart", "", ""),propbar2)
propbar2 <- rbind(c("SEPARATOR", " COMMA", "", ""),propbar2)
propbar2 <- rbind(c("DATASET_MULTIBAR", "", "", ""),propbar2)
write.table(propbar2,"itolpropbar2.txt",col.names=FALSE,row.names=FALSE,sep="
",quote=FALSE)

currenttotuname3 <- donor3fastaotusforfylogeny$V1
RAXMLotuname3 <- paste("QUERY___",currenttotuname3,sep="")
otuname3df <- cbind(currentname3=RAXMLotuname3,wantedname3=wantedforfylogeny3
)

```

```

wantedsangername3 <- splittax(read.table('DataS21.taxonomy'), "seqs")
wantedsangername3$Genus <- mapvalues(wantedsangername3$Genus, from=c("Enterobacteriaceae_unclassified", "Erysipelotrichaceae_unclassified", "Lachnospiraceae_unclassified", "Lactobacillales_unclassified", "Actinobacteria_unclassified", "Burkholderiales_unclassified", "Clostridiales_unclassified"), to=c("Enterobacteriaceae", "Erysipelotrichaceae", "Lachnospiraceae", "Lactobacillales", "Actinobacteria", "Burkholderiales", "Clostridiales"))
currentsangername3 <- as.character(wantedsangername3$id)
wantedsangername3 <- as.character(paste(wantedsangername3$id, wantedsangername3$Genus))
sangername3df <- cbind(currentname3=currentsangername3, wantedname3=wantedsangername3)

itolname3 <- data.frame(rbind(otuname3df, sangername3df))
itolname3$itolcode <- paste(itolname3$currentname3, ",", itolname3$wantedname3, sep="")
itollabel3 <- c("LABELS", "SEPARATOR COMMA", "DATA", itolname3$itolcode)
write.table(itollabel3, "itollabel3.txt", row.names=FALSE, col.names=FALSE, quote=FALSE)

#style labels
itollabelstyle3 <- paste(currentsangername3, "label", "#000000", "bold", "1", sep="")
itollabelstyle3 <- c("TREE_COLORS", "SEPARATOR COMMA", "DATA", itollabelstyle3)
write.table(itollabelstyle3, "itollabelstyle3.txt", row.names=FALSE, col.names=FALSE, quote=FALSE)

# Stacked bar charts of the relative abundance
propbar3 <- subset(shared3misingletonwnwnprop*100, select=c(Donor3_high4_L.V4, Donor3_low4_L.V4, FS_3_isolationhigh.V4))
propbar3 <- propbar3[rownames(propbar3)%in%donor3topotusanger$QueryName, ]
propbar3 <- round(propbar3, 2)
propbar3 <- rownames_to_column(propbar3)
propbar3$rowname <- paste(RDPtax_noprob[propbar3$rowname,]$Genus, propbar3$rowname, sep="_")
propbar3$rowname <- paste("QUERY__", propbar3$rowname, sep="")
propbar3$high <- paste("", propbar3$Donor3_high4_L.V4, sep="")
propbar3$low <- paste("", propbar3$Donor3_low4_L.V4, sep="")
propbar3$FS <- paste("", propbar3$FS_3_isolationhigh.V4, sep="")
propbar3 <- propbar3[, -c(2:4)]
propbar3 <- rbind(c("DATA", "", "", ""), propbar3)
propbar3 <- rbind(c("DATASET_SCALE", "25", "50", "100"), propbar3)
propbar3 <- rbind(c("ALIGN_FIELDS", "0", "", ""), propbar3)
propbar3 <- rbind(c("LEGEND_TITLE", "Relative abundance (%)", "", ""), propbar3)
propbar3 <- rbind(c("LEGEND_SHAPES", "1", "1", "1"), propbar3)
propbar3 <- rbind(c("LEGEND_COLORS", "#323C4D", "#A03D44", "#98B736"), propbar3)
propbar3 <- rbind(c("LEGEND_LABELS", "pH6.8", "pH5.8", "Fecal slurry"), propbar3)

```

```

propbar3 <- rbind(c("WIDTH",",350",",",""),propbar3)
propbar3 <- rbind(c("FIELD_COLORS",",#323C4D",",#A03D44",",#98B736"),propbar3
)
propbar3 <- rbind(c("FIELD_LABELS",",f1",",f2",",f3"),propbar3)
propbar3 <- rbind(c("COLOR",",#ff0000",",",""),propbar3)
propbar3 <- rbind(c("DATASET_LABEL",",barchart",",",""),propbar3)
propbar3 <- rbind(c("SEPARATOR",", COMMA",",",""),propbar3)
propbar3 <- rbind(c("DATASET_MULTIBAR",",","",""),propbar3)
write.table(propbar3,"itolpropbar3.txt",col.names=FALSE,row.names=FALSE,sep="
",quote=FALSE)

currentotuname4 <- donor4fastaotusforfylogeny$V1
RAXMLotuname4 <- paste("QUERY___",currentotuname4,sep="")
otuname4df <- cbind(currentname4=RAXMLotuname4,wantedname4=wantedforfylogeny4
)

wantsangername4 <- splittax(read.table('DataS22.taxonomy'),"seqs")
wantsangername4$Genus <- mapvalues(wantsangername4$Genus,from=c("Enteroba
cteriaceae_unclassified","Erysipelotrichaceae_unclassified","Lachnospiraceae_
unclassified","Lactobacillales_unclassified","Actinobacteria_unclassified","B
urkholderiales_unclassified","Clostridiales_unclassified","Ruminococcaceae_un
classified","Coriobacteriaceae_unclassified","Lactobacillaceae_unclassified",
"Microbacteriaceae_unclassified"),to=c("Enterobacteriaceae","Erysipelotrichac
eae","Lachnospiraceae","Lactobacillales","Actinobacteria","Burkholderiales",
"Clostridiales","Ruminococcaceae","Coriobacteriaceae","Lactobacillaceae","Micr
obacteriaceae"))
currentsangername4 <- as.character(wantsangername4$id)
wantsangername4 <- as.character(paste(wantsangername4$id,wantsangername
4$Genus))
sangername4df <- cbind(currentname4=currentsangername4,wantedname4=wantsang
ername4)

itolname4 <- data.frame(rbind(otuname4df,sangername4df))
itolname4$itolcode <- paste(itolname4$currentname4,",",itolname4$wantedname4,
sep="")
itollabel4<- c("LABELS","SEPARATOR COMMA","DATA",itolname4$itolcode)
write.table(itollabel4,"itollabel4.txt",row.names=FALSE,col.names=FALSE,quote
=FALSE)

#style labels
itollabelstyle4 <- paste(currentsangername4,",label",",#000000",",bold",",1",
sep="")
itollabelstyle4<- c("TREE_COLORS","SEPARATOR COMMA","DATA",itollabelstyle4)
write.table(itollabelstyle4,"itollabelstyle4.txt",row.names=FALSE,col.names=F
ALSE,quote=FALSE)

# Stacked bar charts of the relative abundance
propbar4 <- subset(shared4mingsingletonwnwnprop*100,select=c(Kim8_Donor4_high4
_L,Kim4_Donor4_low4_L,Kim1_Donor4_FS_high))
propbar4 <- propbar4[rownames(propbar4)%in%donor4topotusanger$QueryName,]

```

```

propbar4 <- round(propbar4,2)
propbar4 <- rownames_to_column(propbar4)
propbar4$rowname <-paste(RDPtax4_noprob[propbar4$rowname,]$Genus,propbar4$rowname,sep="_")
propbar4$rowname<- paste("QUERY___",propbar4$rowname,sep="")
propbar4$high <- paste(" ",propbar4$Kim8_Donor4_high4_L,sep="")
propbar4$low<- paste(" ",propbar4$Kim4_Donor4_low4_L,sep="")
propbar4$FS <- paste(" ",propbar4$Kim1_Donor4_FS_high,sep="")
propbar4 <- propbar4[, -c(2:4)]
propbar4 <- rbind(c("DATA", "", "", "" ),propbar4)
propbar4 <- rbind(c("DATASET_SCALE", "25", "50", "100"),propbar4)
propbar4 <- rbind(c("ALIGN_FIELDS", "0", "", "" ),propbar4)
propbar4 <- rbind(c("LEGEND_TITLE", "Relative abundance (%)", "", "" ),propbar4)
propbar4 <- rbind(c("LEGEND_SHAPES", "1", "1", "1"),propbar4)
propbar4 <- rbind(c("LEGEND_COLORS", "#323C4D", "#A03D44", "#98B736"),propbar4)
propbar4 <- rbind(c("LEGEND_LABELS", "pH6.8", "pH5.8", "Fecal slurry"),propbar4)
propbar4 <- rbind(c("WIDTH", "350", "", "" ),propbar4)
propbar4 <- rbind(c("FIELD_COLORS", "#323C4D", "#A03D44", "#98B736"),propbar4)
propbar4 <- rbind(c("FIELD_LABELS", "f1", "f2", "f3"),propbar4)
propbar4 <- rbind(c("COLOR", "#ff0000", "", "" ),propbar4)
propbar4 <- rbind(c("DATASET_LABEL", "barchart", "", "" ),propbar4)
propbar4 <- rbind(c("SEPARATOR", " COMMA", "", "" ),propbar4)
propbar4 <- rbind(c("DATASET_MULTIBAR", "", "", "" ),propbar4)
write.table(propbar4, "itolpropbar4.txt", col.names=FALSE, row.names=FALSE, sep=" ", quote=FALSE)

```
