# Supplementary material for: Isolation of wheat bran-colonizing and metabolizing species from the human fecal microbiota
Source: PeerJ journal article supplement (doi:10.7717/peerj.6293), 2019-01-25

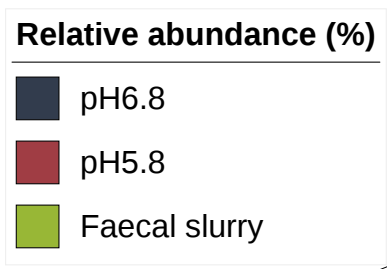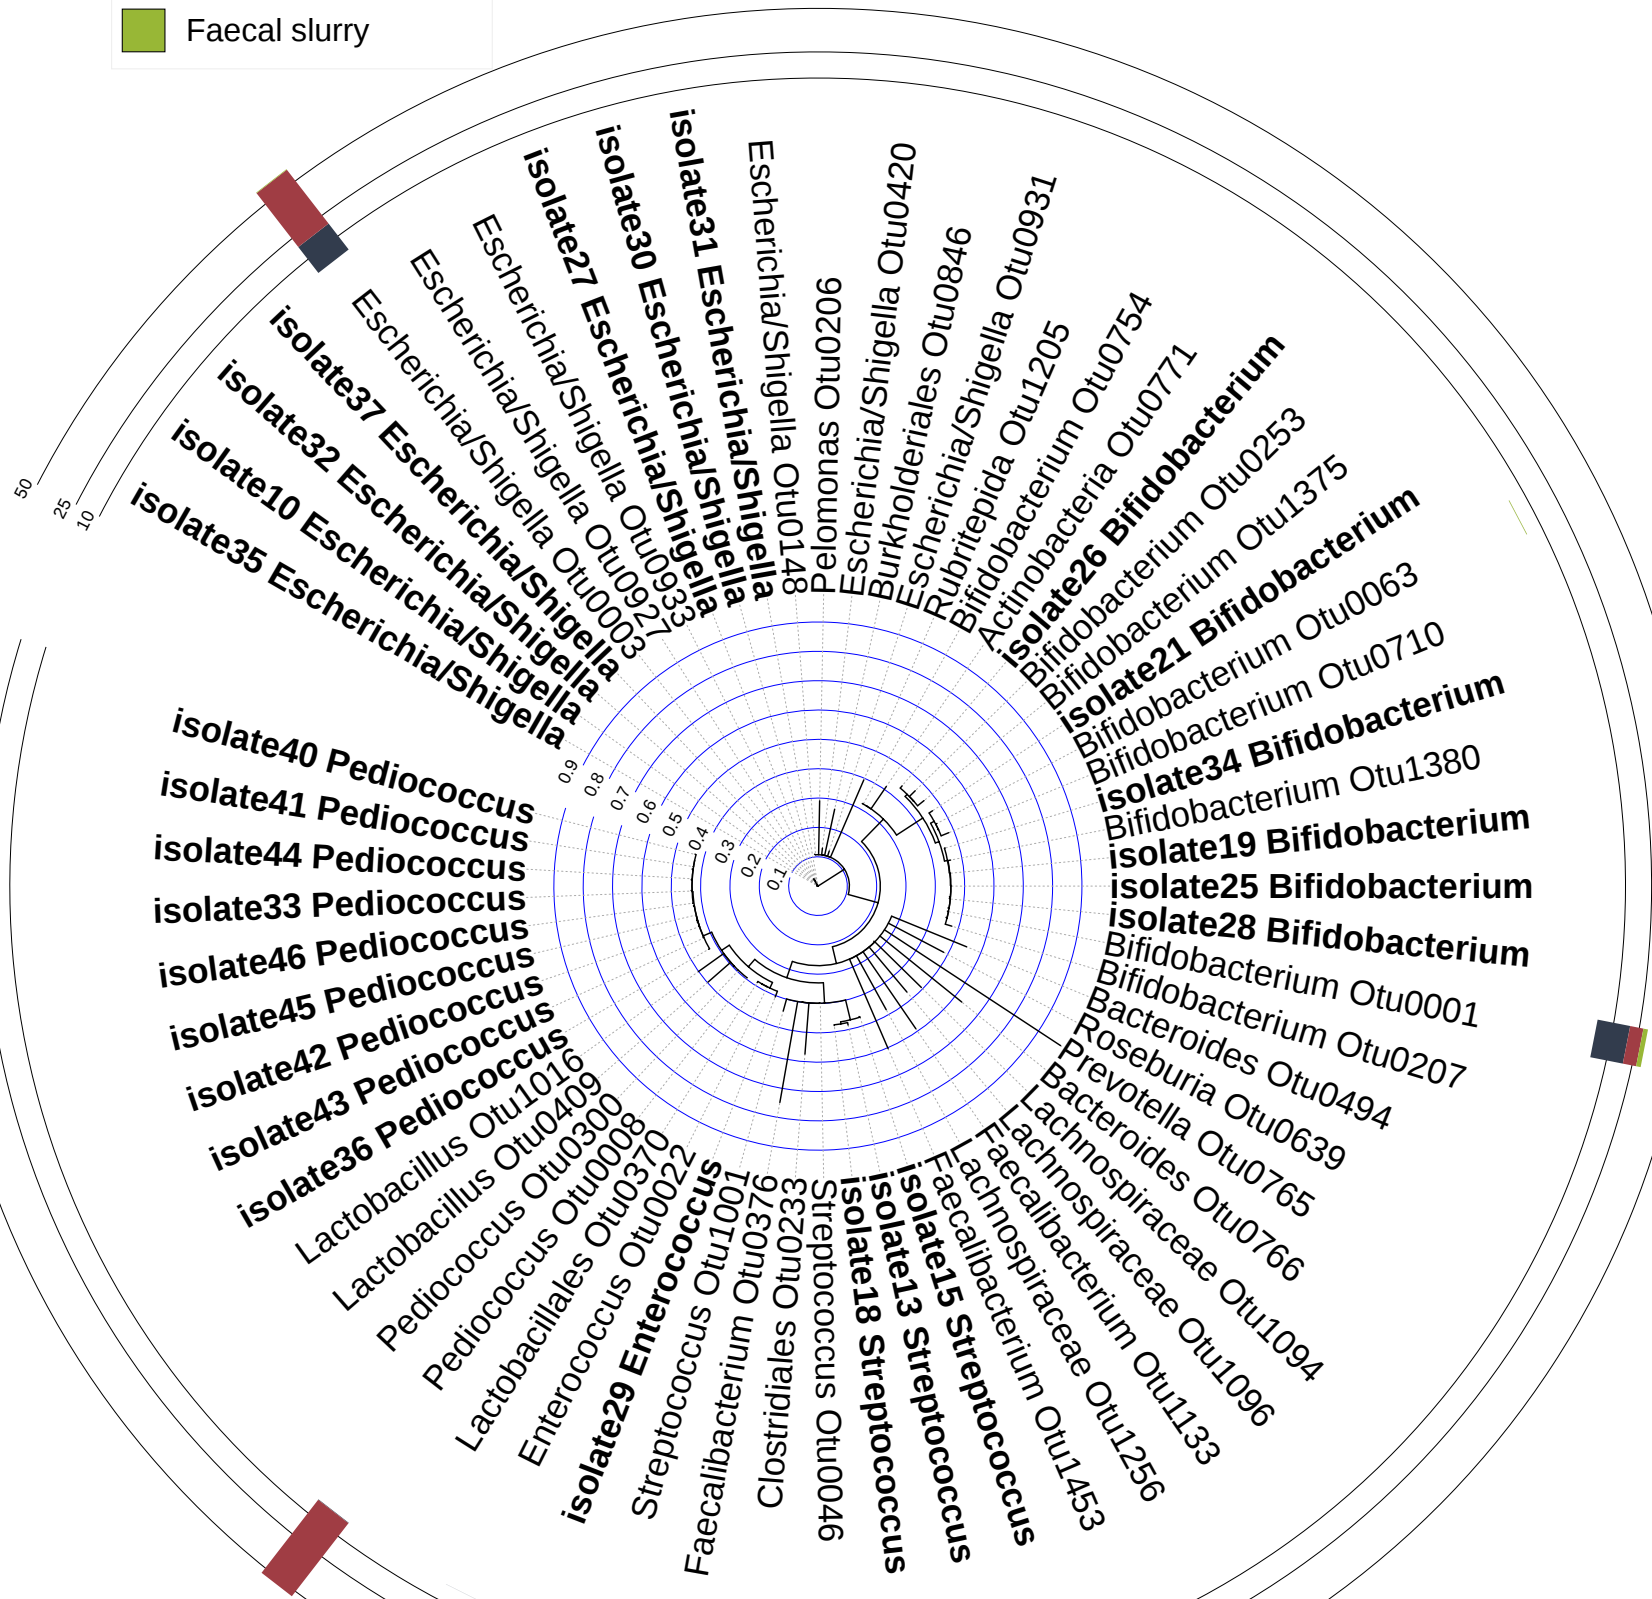

Supplement: FigureS2.pdf [file FigureS2.pdf]
